# Supplementary material for: Total synthesis and stereochemical revision of xiamenmycin A
Source: Royal Society of Chemistry journal article supplement (doi:10.1039/c5ob02476e), 2016-01-01
Supplement: c5ob02476e1.pdf [file c5ob02476e1.pdf]

## Supporting information

### Total Synthesis and Stereochemical Revision of Xiamenmycin A

Xiaozhen Jiao,<sup>a</sup> Yangyang Yao,<sup>a</sup> Beibei Yang,<sup>a</sup> Xiaoyu Liu,<sup>a</sup> Xiaoyu Li,<sup>a</sup> Hongguang Yang,<sup>a</sup> Li Li,<sup>a</sup> Jun Xu,<sup>b</sup> Minjuan Xu,<sup>c\*</sup> Ping Xie,<sup>a\*</sup>

<sup>a</sup> State Key Laboratory of Bioactive Substances and Functions of Natural Medicines, Institute of Materia Medica, Beijing Key Laboratory of Active Substances Discovery and Drugability Evaluation, Peking Union Medical College and Chinese Academy of Medical Sciences, Beijing 100050, PR China. Fax: +86 10 63017757; Tel: +86 10 63165242; E-mail: xp@imm.ac.cn

<sup>b</sup> Institute of Oceanology, Shanghai Jiao Tong University, Shanghai 200240, PR China.

<sup>c</sup> Key Laboratory of Systems Biomedicine, Shanghai Center for Systems Biomedicine, Shanghai Jiao Tong University, Shanghai 200240, PR China. Fax: +86-21-34206866; Tel: +86-21-34206244; E-mail: minjuanxu@sjtu.edu.cn

## Contents

|                                                                                          |     |
|------------------------------------------------------------------------------------------|-----|
| General Information .....                                                                | S2  |
| HPLC spectra .....                                                                       | S3  |
| The experimental CD spectrum of <b>17</b> and theoretical CD spectrum of <b>17</b> ..... | S10 |
| <sup>1</sup> H and <sup>13</sup> C NMR spectra .....                                     | S11 |
| The NMR data comparison of <b>1</b> , <b>24</b> and natural xiamenmycin A .....          | S36 |

### General Information

Solvents were dried according to standard procedures where needed. All reagents and solvents were purchased from commercial suppliers. Column chromatography was carried out on silica gel (160–200 mesh). Melting points were measured on microscope melting point apparatus. IR spectra were recorded on a Thermo Nicolet 5700 FT-IR microscope Centaur  $\mu$ s spectrophotometer. NMR spectra were recorded on 400 or 600 MHz NMR spectrometer. Chemical shifts are referenced to the residual solvent peak and reported in ppm ( $\delta$  scale) and all coupling constant ( $J$ ) values are given in Hz. The following multiplicity abbreviations are used: (s) singlet, (d) doublet, (t) triplet, (q) quartet, (m) multiplet, and (br) broad. ESI-HRMS data were measured on orbitrap mass spectrometer.

HPLC analysis: Column: Pinnade II C18 Column size: 0.46 cm I.D. x 25 cm L x 5 μ m; column temperature: 35°C; injection volume: 20μL; mobile phase: CH<sub>3</sub>CN/H<sub>2</sub>O/0.1%HCOOH; flow rate: 1.0mL/min Wavelength : 272nm; a gradient program was used as follows:

| Time(min) | CH <sub>3</sub> CN(%) | H <sub>2</sub> O(%) |
|-----------|-----------------------|---------------------|
| 0         | 5                     | 95                  |
| 5         | 5                     | 95                  |
| 35        | 90                    | 10                  |
| 40        | 90                    | 10                  |
| 50        | 5                     | 95                  |
| 55        | 5                     | 95                  |

Sample Information

Acquired by : Admin  
Sample Name : JXZ 22-25-11  
Tray# : 1  
Vial# : 12  
Injection Volume : 20 uL  
Data Filename : 13.lcd  
Method name : D:\方法\JXZ.lcm  
Method Filename : JXZ-2.lcm  
Batch Filename : JXZ.lcb  
Report Filename : Default.lcr  
Date Acquired : 2015-11-17 2:06:39  
Data Processed : 2015-11-17 9:35:48

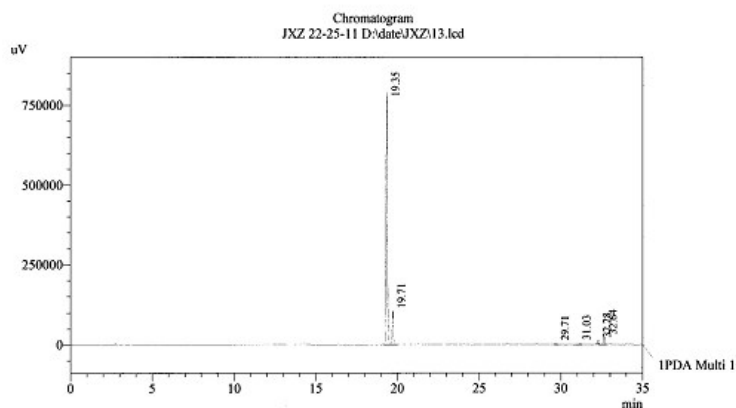

PeakTable

| Peak# | Ret. Time | Area    | Height | Area %  |
|-------|-----------|---------|--------|---------|
| 1     | 19.34     | 4080229 | 789568 | 82.389  |
| 2     | 19.70     | 554239  | 106634 | 11.191  |
| 3     | 29.71     | 23795   | 4479   | 0.480   |
| 4     | 31.03     | 39953   | 5912   | 0.807   |
| 5     | 32.28     | 74034   | 13252  | 1.495   |
| 6     | 32.64     | 138968  | 23930  | 2.806   |
| 7     | 36.98     | 41176   | 7852   | 0.831   |
| Total |           | 4952395 | 951628 | 100.000 |

PDA Ch1 272nm 4nm

HPLC spectra of compound 7 and 7' ( entry 11 in Table 1)

## HPLC ANALYSIS

Determination of the enantiomeric excess of compound **6** and **16**. column: CHIRALPAK OJ-H 0.46 cm I.D. x 25 cm L x 5  $\mu$  m; column temperature: 25°C; injection volume: 10  $\mu$ L; mobile phase: hexane/*i*-PrOH (9/1); flow rate: 0.3mL/min **Wavelength: 272 nm**

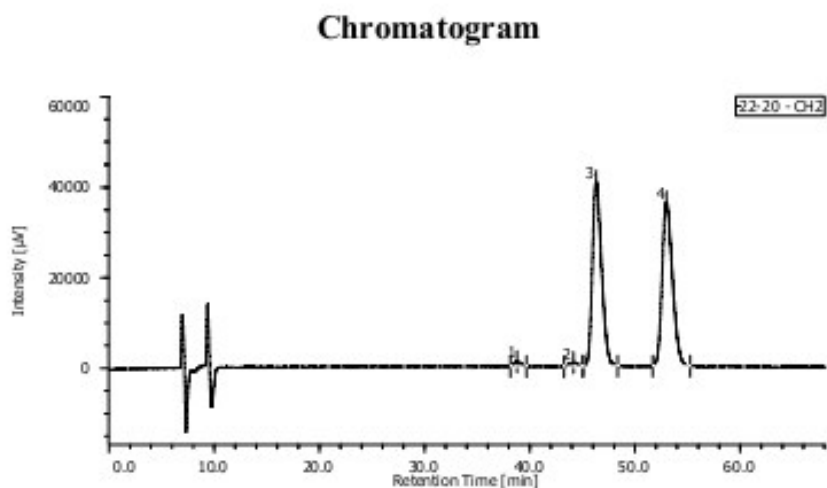

### Chromatogram Information

|                        |                                |
|------------------------|--------------------------------|
| User Name              | Administrator                  |
| Date Modified          | 2015-10-29 16:24:52            |
| Description            |                                |
| HPLC System Name       | HPLC                           |
| Injection Date         | 2015-10-29 15:12:14            |
| Volume                 | 10.00 [ $\mu$ L]               |
| Sample Number          | 1                              |
| Project Name           | chiral drugs-sep               |
| Acquisition Time       | 68.0 [min] + 10.0 [min]        |
| Acquisition Sequence   | JXZ-22-20-OJ-IPA1 (0.5-70-272) |
| Control Method         | JXZ-OJ-IPA10 (0.5-70-272)      |
| Peak ID Table          |                                |
| Calibration Method     |                                |
| Additional Information |                                |

### Channel & Peak Information Table

|                   |             |
|-------------------|-------------|
| Chromatogram Name | 22-20-CH2   |
| Sample Name       | CH2         |
| Channel Name      | CH2         |
| Sampling Interval | 500 [msec]  |
| Peak Method       | pcz-05-peak |
| Formula           |             |

| Decision |           |    |          |                             |                   |        |         |            |                 |                 |
|----------|-----------|----|----------|-----------------------------|-------------------|--------|---------|------------|-----------------|-----------------|
| #        | Peak Name | CH | RT [min] | Area [ $\mu$ V $\cdot$ sec] | Height [ $\mu$ V] | Area%  | Height% | Resolution | Symmetry Factor | Capacity Factor |
| 1        | Unknown   | 2  | 38.767   | 51475                       | 1064              | 1.019  | 1.340   | 3.855      | 1.195           | N/A             |
| 2        | Unknown   | 2  | 44.193   | 52500                       | 933               | 1.040  | 1.180   | 1.590      | N/A             | N/A             |
| 3        | Unknown   | 2  | 46.202   | 2480262                     | 40840             | 49.056 | 51.663  | 3.948      | 1.296           | N/A             |
| 4        | Unknown   | 2  | 52.967   | 2471668                     | 36215             | 48.885 | 45.811  | N/A        | 1.277           | N/A             |

## HPLC spectra of rac-6

## Chromatogram

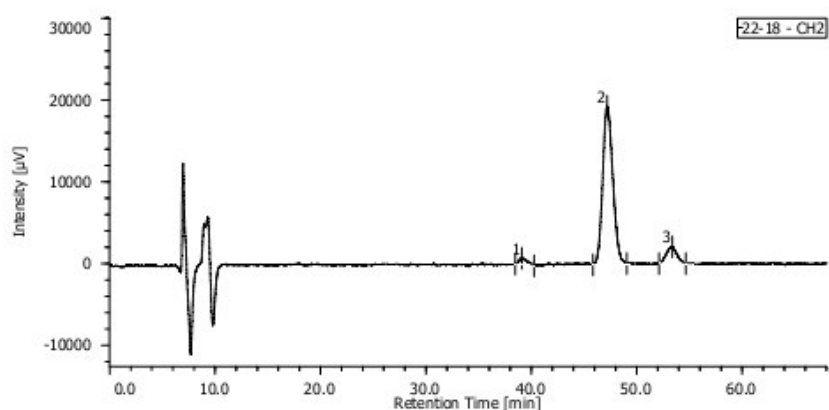

### Chromatogram Information

User Name Administrator  
 Date Modified 2015-10-29 19:53:33  
 Description  
 HPLC System Name HPLC  
 Injection Date 2015-10-29 18:45:31  
 Volume 20.00 [µL]  
 Sample Number 3  
 Project Name chiral drugs-sep  
 Acquisition Time 68.0 [min]  
 Acquisition Sequence JX Z-22-18-OJ-IPA10(0.5-70-272)  
 Control Method JX Z-OJ-IPA10(0.5-70-272)  
 Peak ID Table  
 Calibration Method  
 Additional Information

### Channel & Peak Information Table

Chromatogram Name 22-18-CH2  
 Sample Name  
 Channel Name CH2  
 Sampling Interval 500 [msac]  
 Peak Method jxz-oj-peak  
 Formula  
 Decision

| # | Peak Name | CH | TR [min] | Area [µV.sec] | Height [µV] | Area%  | Height% | Resolution | Symmetry Factor | Capacity Factor |
|---|-----------|----|----------|---------------|-------------|--------|---------|------------|-----------------|-----------------|
| 1 | Unknown   | 2  | 39.083   | 45208         | 793         | 3.022  | 3.566   | 4.902      | 1.447           | N/A             |
| 2 | Unknown   | 2  | 47.192   | 1301437       | 89363       | 87.009 | 87.079  | 3.358      | 1.161           | N/A             |
| 3 | Unknown   | 2  | 53.350   | 149112        | 2080        | 9.969  | 9.355   | N/A        | 1.029           | N/A             |

## HPLC spectra of 6

## Chromatogram

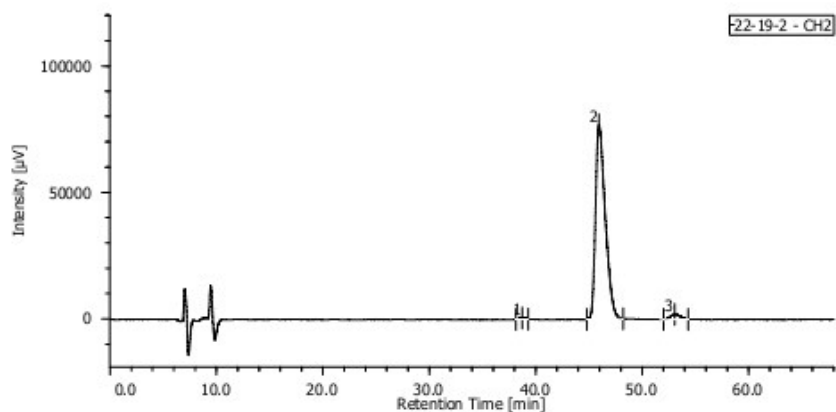

### Chromatogram Information

User Name Administrator  
 Date Modified 2015-10-29 17:36:12  
 Description  
 HPLC System Name HPLC  
 Injection Date 2015-10-29 16:28:09  
 Volume 10.00 [μL]  
 Sample Number 2  
 Project Name chiral drugs-sep  
 Acquisition Time 68.0 [min]  
 Acquisition Sequence JXZ-22-19-2-OJ-IPA10(0.5-70-272)  
 Control Method JXZ-OJ-IPA10(0.5-70-272)  
 Peak ID Table  
 Calibration Method  
 Additional Information

### Channel & Peak Information Table

Chromatogram Name 22-19-2-CH2  
 Sample Name  
 Channel Name CH2  
 Sampling Interval 500 [msec]  
 Peak Method jxz-oj-peak  
 Formula  
 Decision

| # | Peak Name | CH | IR [min] | Area [μV·sec] | Height [μV] | Area%  | Height% | Resolution | Symmetry Factor | Capacity Factor |
|---|-----------|----|----------|---------------|-------------|--------|---------|------------|-----------------|-----------------|
| 1 | Unknown   | 2  | 38.708   | 18950         | 508         | 0.376  | 0.641   | 5.325      | 1.002           | N/A             |
| 2 | Unknown   | 2  | 45.913   | 4895067       | 76838       | 97.074 | 96.849  | 4.172      | 1.543           | N/A             |
| 3 | Unknown   | 2  | 53.058   | 128607        | 1992        | 2.550  | 2.510   | N/A        | 1.084           | N/A             |

**HPLC spectra of 6 (After recrystallization)**

Data File E:\DATA\ZYH\201508180000003.D  
Sample Name: 21-6

=====

|                                                                            |                    |
|----------------------------------------------------------------------------|--------------------|
| Acq. Operator : □ □                                                        | Seq. Line : 1      |
| Acq. Instrument : Agilent 1260                                             | Location : Vial 1  |
| Injection Date : 8/18/2015 12:07:38 AM                                     | Inj : 3            |
|                                                                            | Inj Volume : 10 µl |
| Acq. Method : C:\Chem32\1\DATA\ZYH\20150727 2015-08-18 12-24-45\20150818.M |                    |
| Last changed : 8/17/2015 9:24:45 PM by □ □                                 |                    |
| Analysis Method : C:\CHEM32\2\METHODS\150818.M                             |                    |
| Last changed : 8/19/2015 10:33:02 AM                                       |                    |

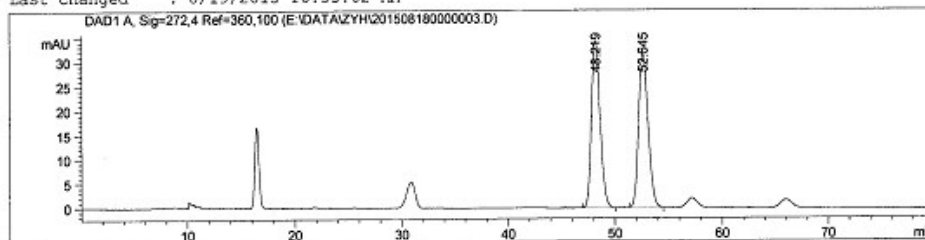

=====  
Area Percent Report  
=====

Sorted By : Signal  
Multiplier : 1.0000  
Dilution : 1.0000  
Use Multiplier & Dilution Factor with ISTDs

Signal 1: DAD1 A, Sig=272,4 Ref=360,100

| Peak # | RetTime [min] | Type | Width [min] | Area [mAU*s] | Height [mAU] | Area %  |
|--------|---------------|------|-------------|--------------|--------------|---------|
| 1      | 48.219        | BB   | 0.8650      | 1948.59386   | 34.39162     | 50.0452 |
| 2      | 52.645        | BB   | 0.9428      | 1945.06433   | 31.56852     | 49.9548 |

Totals : 3893.64819 65.96015

=====  
\*\*\* End of Report \*\*\*

## HPLC spectra of rac-16

Data File E:\DATA\ZYH\201508180000006.D  
Sample Name: 22-9-BL

=====

|                 |                                                                |            |          |
|-----------------|----------------------------------------------------------------|------------|----------|
| Acq. Operator   | : □ □                                                          | Seq. Line  | : 3      |
| Acq. Instrument | : Agilent 1260                                                 | Location   | : Vial 3 |
| Injection Date  | : 8/18/2015 4:10:35 AM                                         | Inj        | : 1      |
|                 |                                                                | Inj Volume | : 10 µl  |
| Acq. Method     | : C:\Chem32\1\DATA\ZYH\20150727 2015-08-18 12-24-45\20150818.M |            |          |
| Last changed    | : 8/17/2015 9:24:45 PM by □ □                                  |            |          |
| Analysis Method | : C:\CHEM32\2\METHODS\150818.M                                 |            |          |
| Last changed    | : 8/19/2015 10:34:01 AM                                        |            |          |

=====

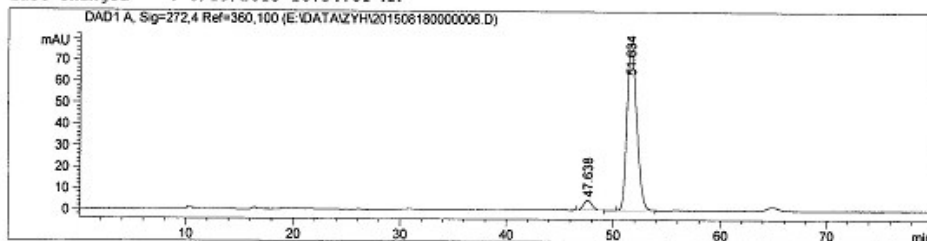

=====  
Area Percent Report  
=====

Sorted By : Signal  
Multiplier : 1.0000  
Dilution : 1.0000  
Use Multiplier & Dilution Factor with ISTDs

Signal 1: DAD1 A, Sig=272,4 Ref=360,100

| Peak # | RetTime [min] | Type | Width [min] | Area [mAU*s] | Height [mAU] | Area %  |
|--------|---------------|------|-------------|--------------|--------------|---------|
| 1      | 47.638        | BB   | 0.6618      | 244.94620    | 4.49463      | 4.7715  |
| 2      | 51.634        | BB   | 0.9497      | 4888.58838   | 78.16419     | 95.2285 |

Totals : 5133.53458 82.65883

=====  
\*\*\* End of Report \*\*\*



HPLC analysis for compound **1**, **24** and natural xiamenmycin A: CHIRALPAK OZ-H; Column size: 0.46 cm I.D. x 25 cm L x 5  $\mu$  m; column temperature: 35°C; injection volume: 5  $\mu$  L; mobile phase: n-Hexane/EtOH/TFA=80/20/0.1 (V/V/V); flow rate: 1.0 mL/min Wavelength: 254 nm

A) Mixture of synthetic samples

|                  |                                               |
|------------------|-----------------------------------------------|
| Column           | : CHIRALCEL® OZ-H                             |
| Column size      | : 0.46 cm I.D. x 25 cm L x 5 $\mu$ m          |
| Injection        | : 25 $\mu$ l                                  |
| Mobile phase     | : 烷烃和醇类                                       |
| Flow rate        | :                                             |
| Wave length      | :                                             |
| Temperature      | :                                             |
| Sample solution  | : 取 19-9 和 40-3 各 100UL 用 EtOH Hexane 稀释到 1ML |
| HPLC equipment   | : Shimadzu LC 20 with UV detector SPD-20A     |
| Sample structure | A150106X 19-9+40-3                            |

< Chromatogram >

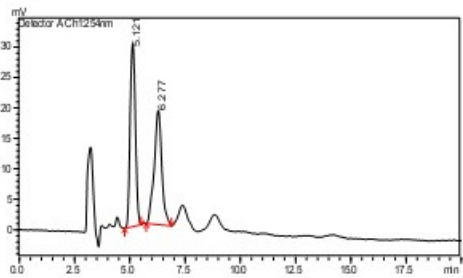

<Column Performance Report>

| Peak No. | Time  | Area   | Area %  | Plate number | Tailing | Resolution |
|----------|-------|--------|---------|--------------|---------|------------|
| 1        | 5.121 | 501812 | 52.6832 | 2002.330     | 1.123   | --         |
| 2        | 6.277 | 450697 | 47.3168 | 1692.447     | 1.034   | 2.164      |

B) Compound 1 (synthetic sample)

|                  |                                           |
|------------------|-------------------------------------------|
| Column           | : CHIRALCEL® OZ-H                         |
| Column size      | : 0.46 cm I.D. x 25 cm L x 5 $\mu$ m      |
| Injection        | : 5 $\mu$ l                               |
| Mobile phase     | :                                         |
| Flow rate        | :                                         |
| Wave length      | :                                         |
| Temperature      | :                                         |
| Sample solution  | : 透样已配                                    |
| HPLC equipment   | : Shimadzu LC 20 with UV detector SPD-20A |
| Sample structure | A150106X 19-9                             |

< Chromatogram >

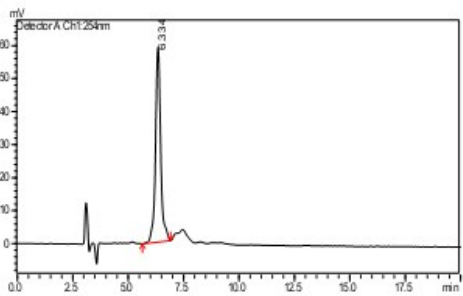

<Column Performance Report>

| Peak No. | Time  | Area   | Area %   | Plate number | Tailing | Resolution |
|----------|-------|--------|----------|--------------|---------|------------|
| 1        | 6.334 | 971074 | 100.0000 | 3647.273     | 1.156   | --         |

### C) Compound 24 (synthetic sample)

|                  |                                           |      |
|------------------|-------------------------------------------|------|
| Column           | : CHIRALCEL®                              | OZ-H |
| Column size      | : 0.46 cm I.D. ×25 cm L×5 µm              |      |
| Injection        | : 5 µl                                    |      |
| Mobile phase     | :                                         |      |
| Flow rate        | :                                         |      |
| Wave length      | :                                         |      |
| Temperature      | :                                         |      |
| Sample solution  | : 送样已配                                    |      |
| HPLC equipment   | : Shimadzu LC 20 with UV detector SPD-20A |      |
| Sample structure | A150106X                                  | 40-3 |

< Chromatogram >

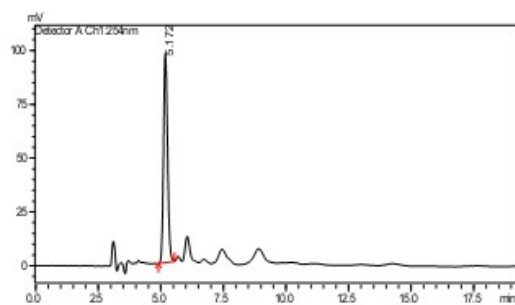

<Column Performance Report>

| Peak No. | Time  | Area    | Area %   | Plate number | Tailing | Resolution |
|----------|-------|---------|----------|--------------|---------|------------|
| 1        | 5.172 | 1092709 | 100.0000 | 4120.876     | 1.227   | --         |

### D) Xiamenmycin sample (natural product)

|                  |                                           |       |
|------------------|-------------------------------------------|-------|
| Column           | : CHIRALCEL®                              | OZ-H  |
| Column size      | : 0.46 cm I.D. ×25 cm L×5 µm              |       |
| Injection        | : 5 µl                                    |       |
| Mobile phase     | :                                         |       |
| Flow rate        | :                                         |       |
| Wave length      | :                                         |       |
| Temperature      | :                                         |       |
| Sample solution  | : 送样已配                                    |       |
| HPLC equipment   | : Shimadzu LC 20 with UV detector SPD-20A |       |
| Sample structure | A150106X                                  | Xia.A |

< Chromatogram >

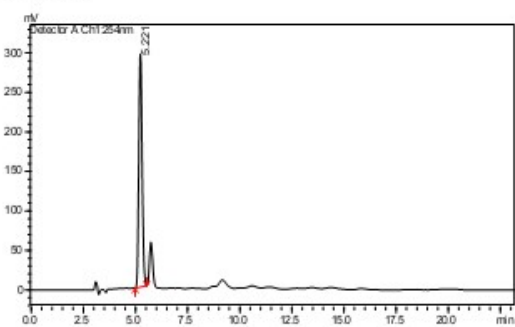

<Column Performance Report>

| Peak No. | Time  | Area    | Area %   | Plate number | Tailing | Resolution |
|----------|-------|---------|----------|--------------|---------|------------|
| 1        | 5.221 | 3311420 | 100.0000 | 4150.407     | 1.208   | --         |

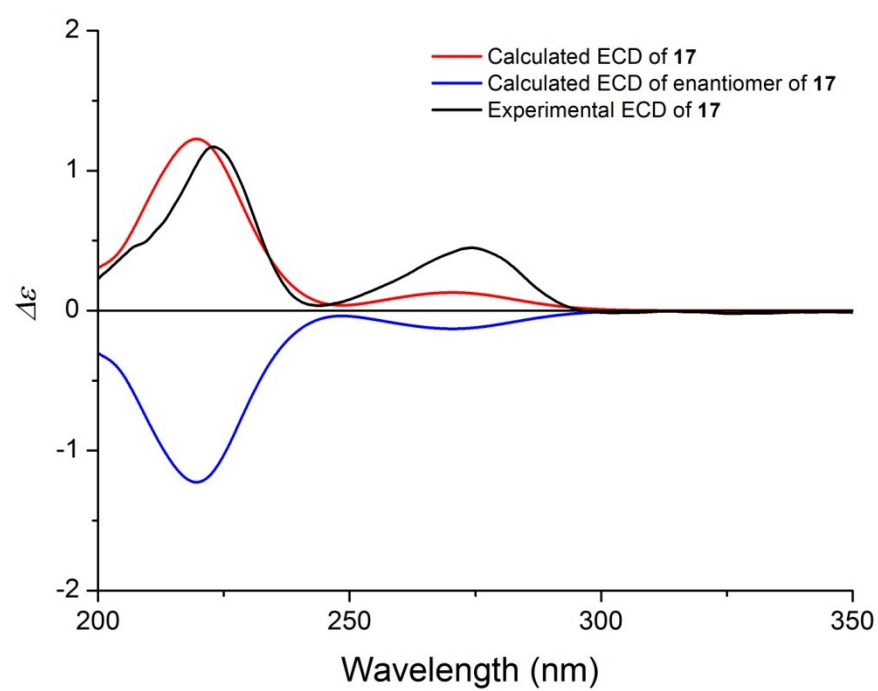

The theoretical CD spectrum and experimental CD spectrum of **17**

JXZ22-16 400M <sup>1</sup>H-NMR in CDCl<sub>3</sub>

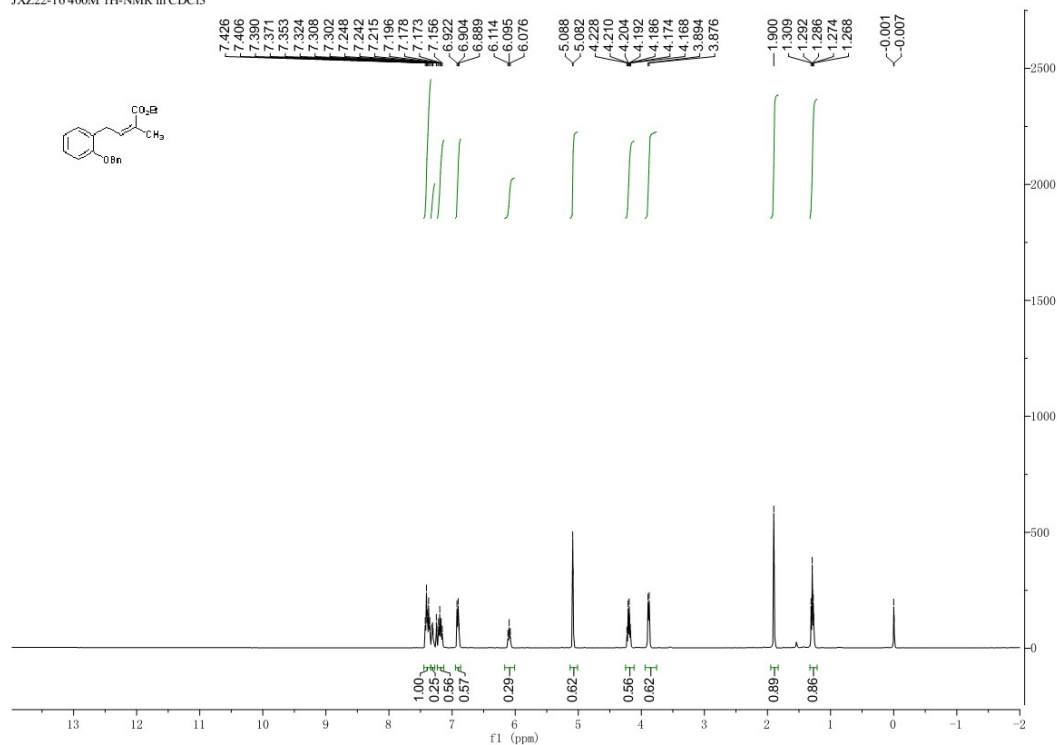

<sup>1</sup>H NMR spectra of compound 4

100M <sup>13</sup>C-NMR JXZ22-16 in CDCl<sub>3</sub>

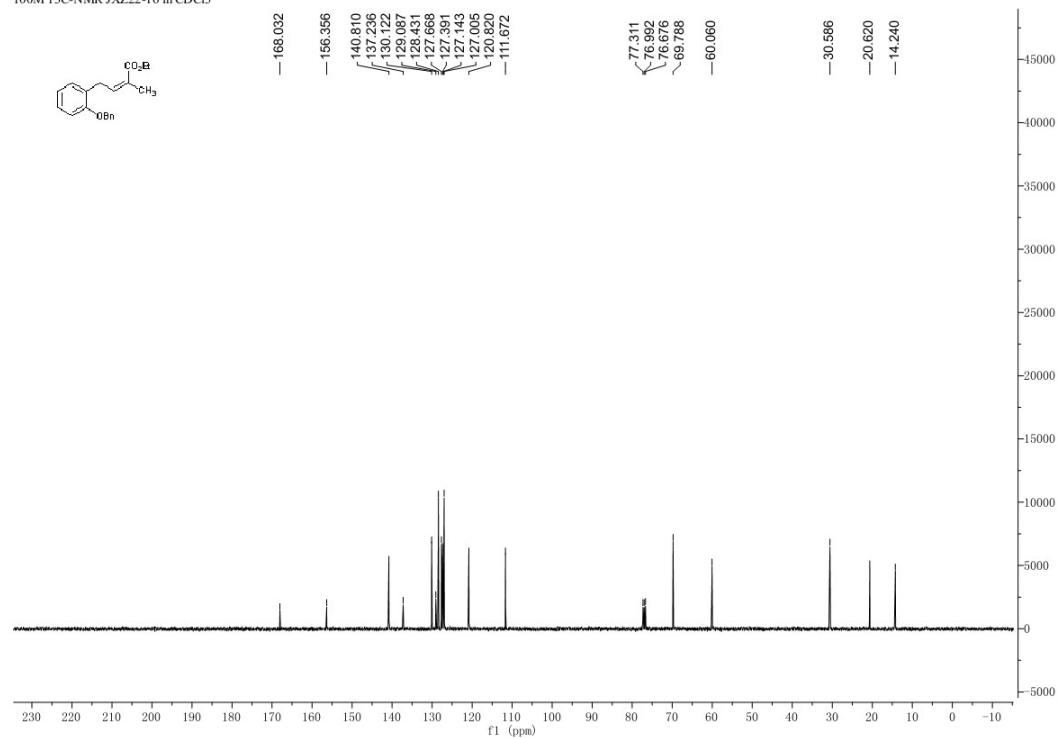

<sup>13</sup>C NMR spectra of compound 4

400M <sup>1</sup>H-NMR JXZ22-17 in CDCl<sub>3</sub>

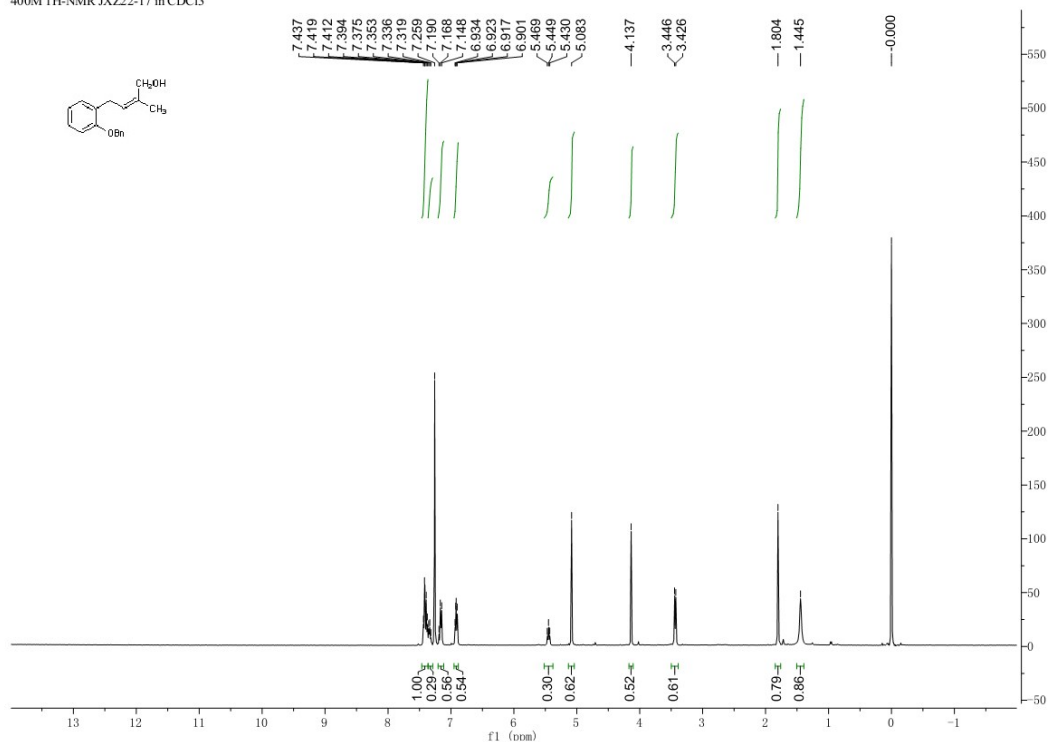

<sup>1</sup>H NMR spectra of compound **5**

100M <sup>13</sup>C-NMR JXZ22-17 in CDCl<sub>3</sub>

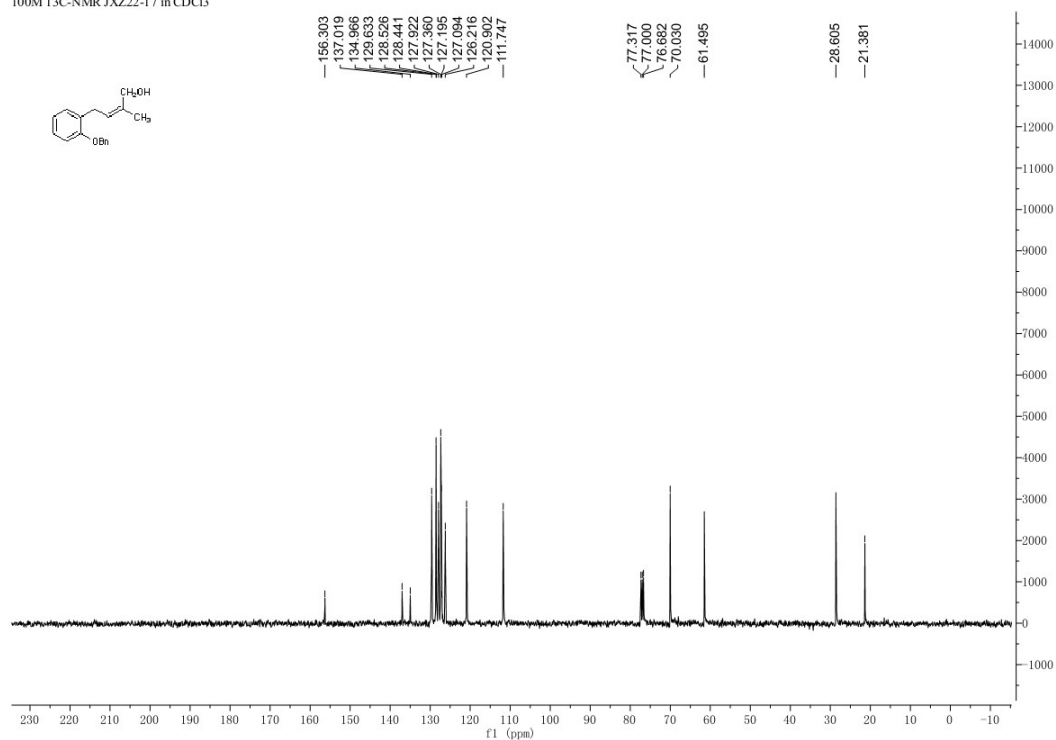

<sup>13</sup>C NMR spectra of compound **5**

400M <sup>1</sup>H-NMR JXZ21-39 in CDCl<sub>3</sub>

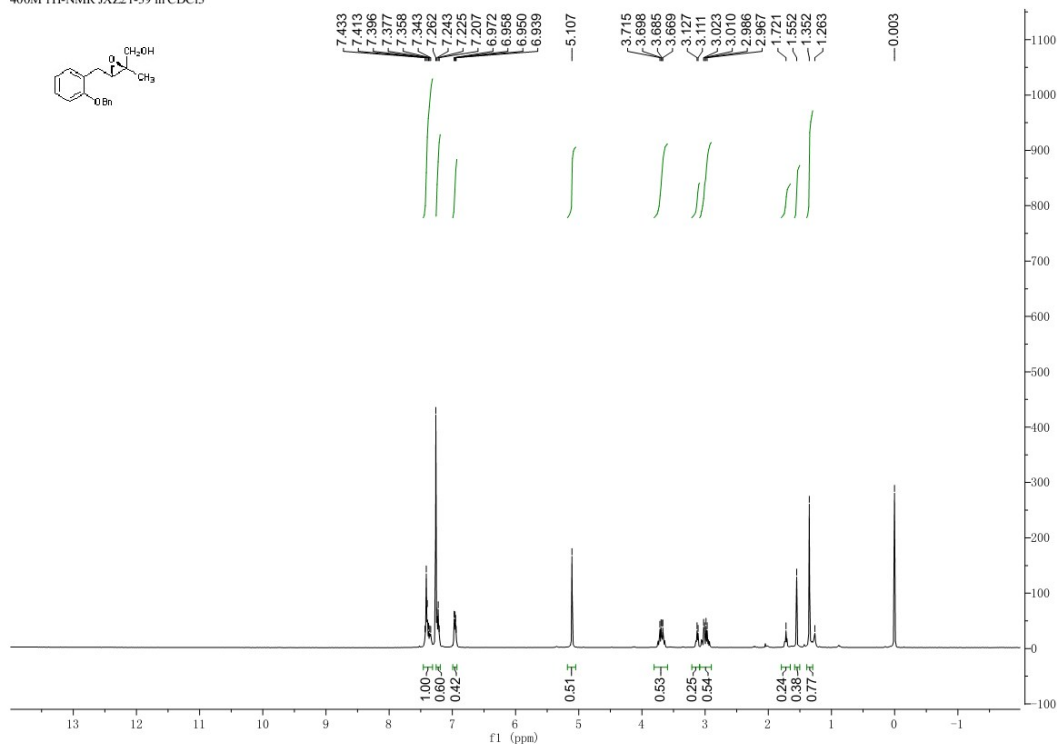

<sup>1</sup>H NMR spectra of compound 6

100M <sup>13</sup>C-NMR JXZ21-39 in CDCl<sub>3</sub>

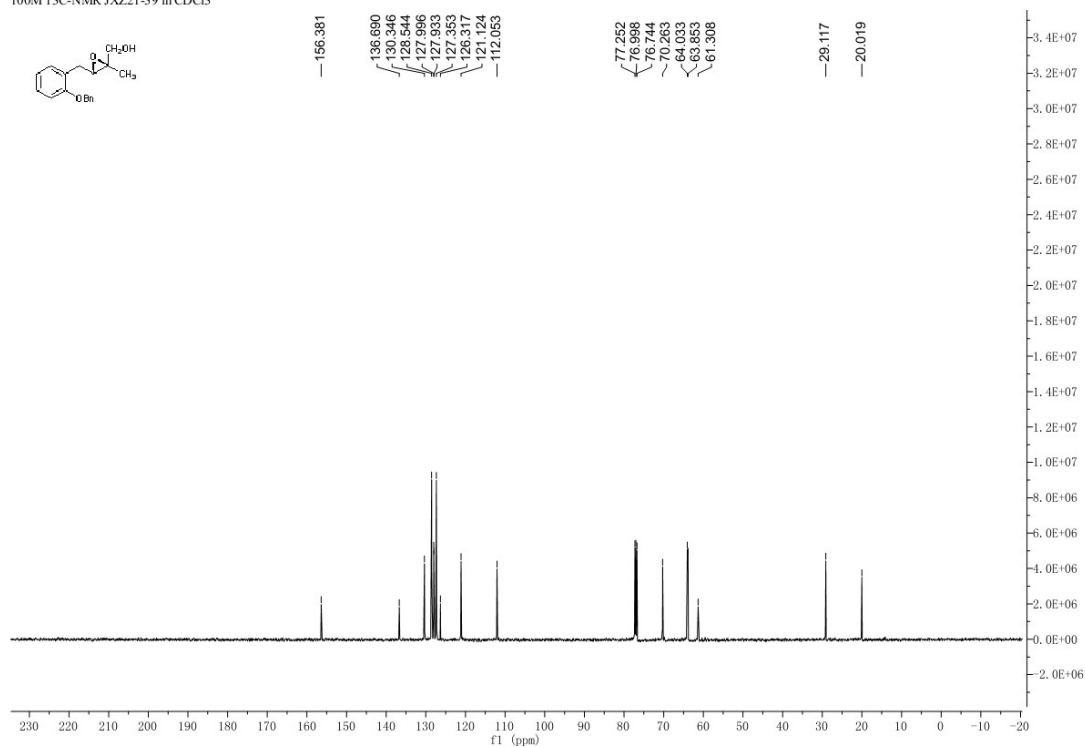

<sup>13</sup>C NMR spectra of compound 6

400M <sup>1</sup>H-NMR JXZ22-19 in CDCl<sub>3</sub>

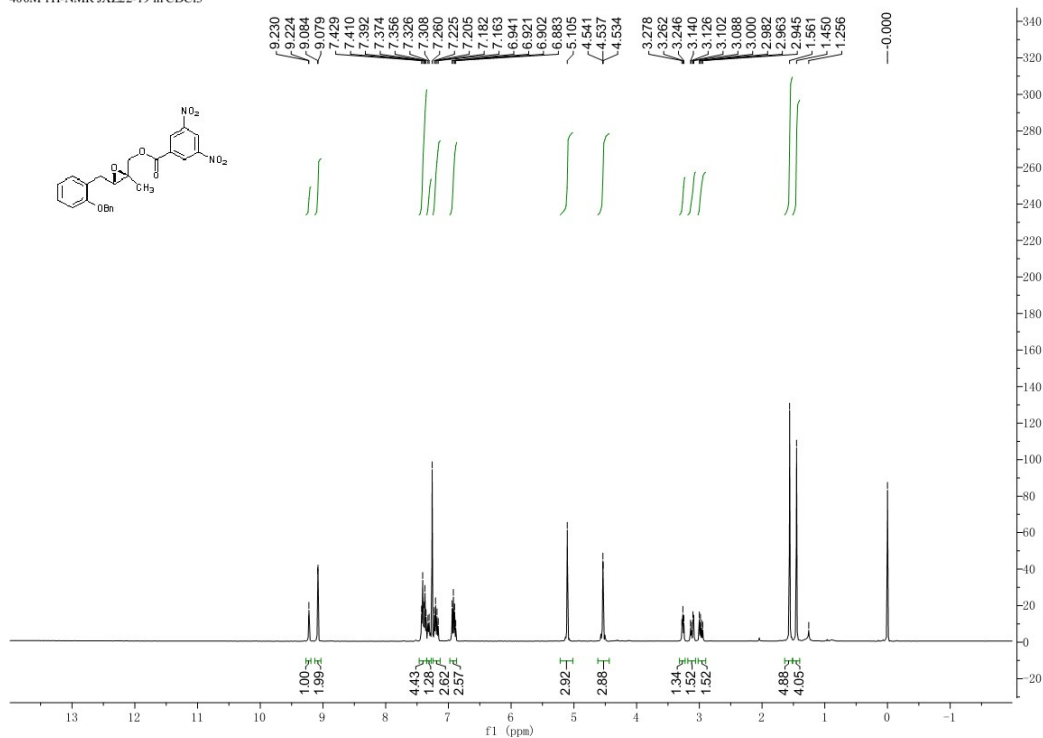

<sup>1</sup>H NMR spectra of compound **6b**

100M <sup>13</sup>C-NMR JXZ22-19 in CDCl<sub>3</sub>

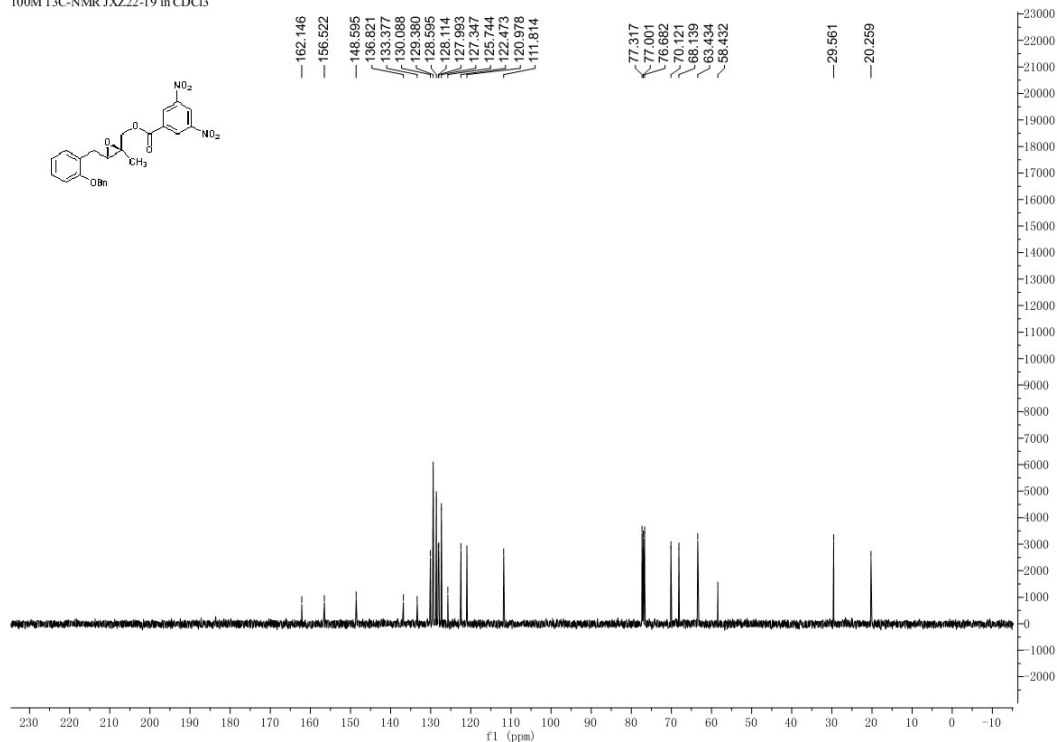

<sup>13</sup>C NMR spectra of compound **6b**

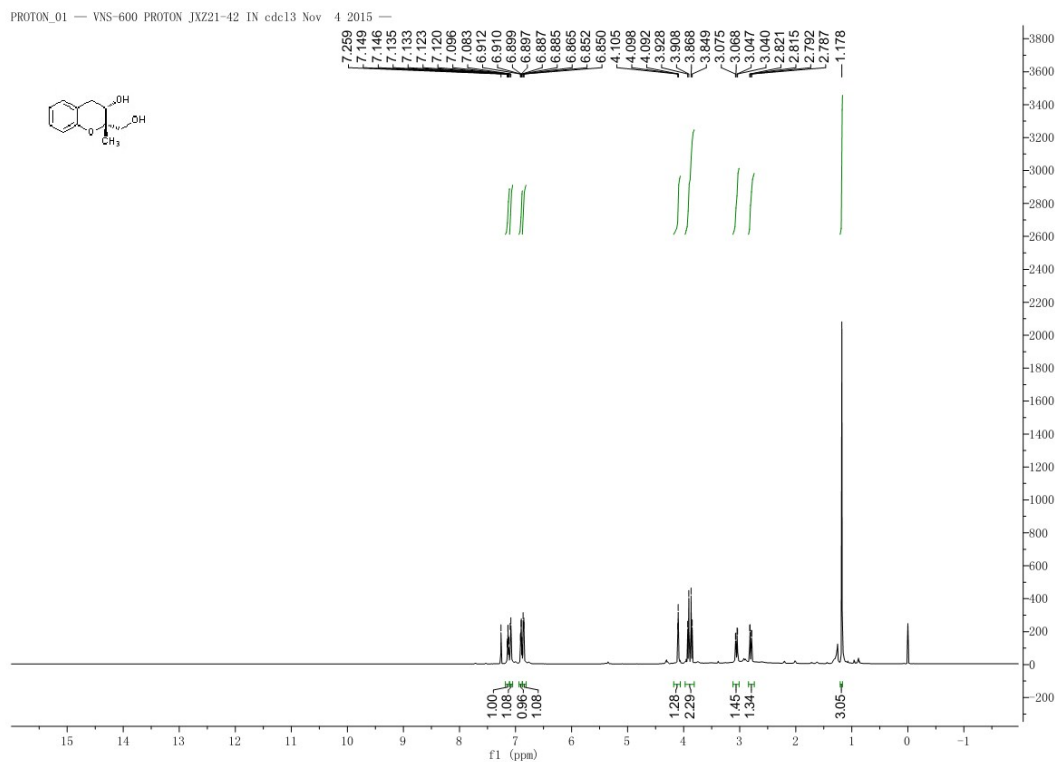

<sup>1</sup>H NMR spectra of compound 7

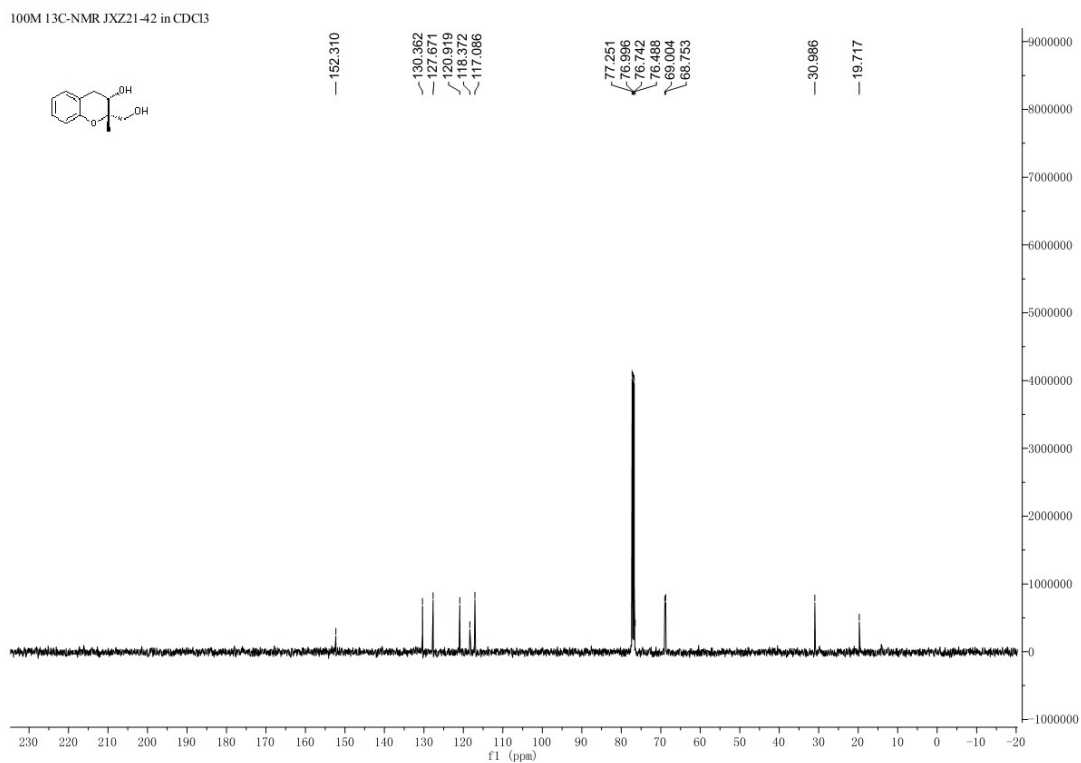

<sup>13</sup>C NMR spectra of compound 7



VNS-600 NOESY1D JXZ21-42 IN cdcl3 Nov 4 2015

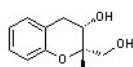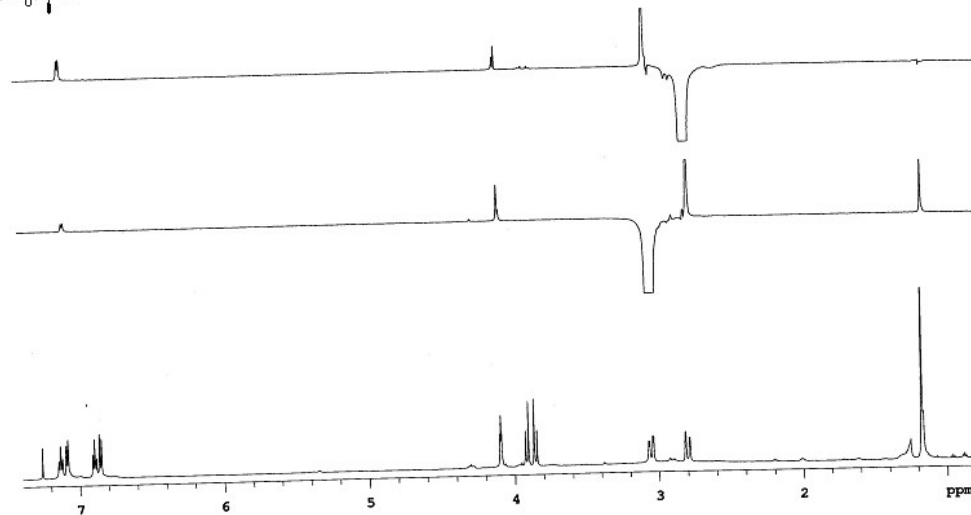

NOE spectra of compound 7

VNS-600 NOESY1D JXZ21-42 IN cdcl3 Nov 4 2015

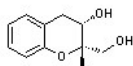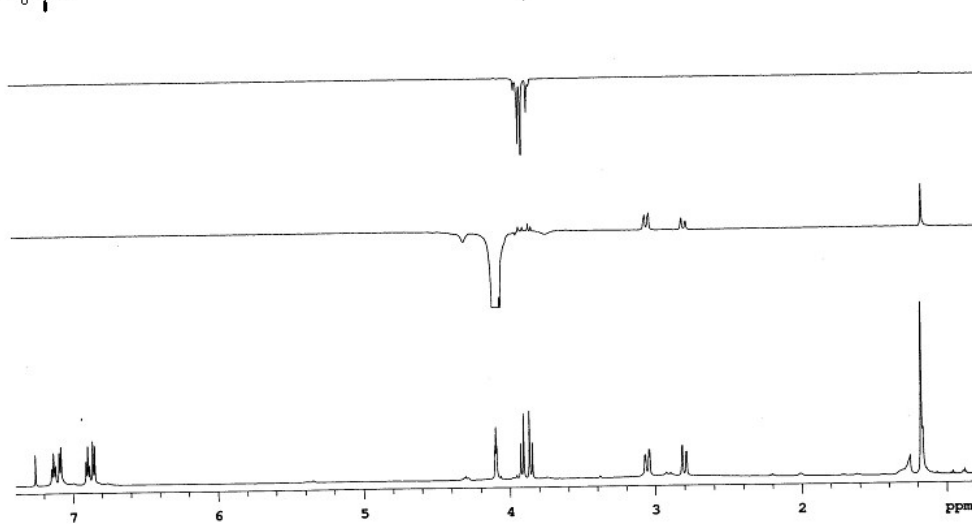

NOE spectra of compound 7

400M <sup>1</sup>H-NMR JXZ21-44 in CDCl<sub>3</sub>

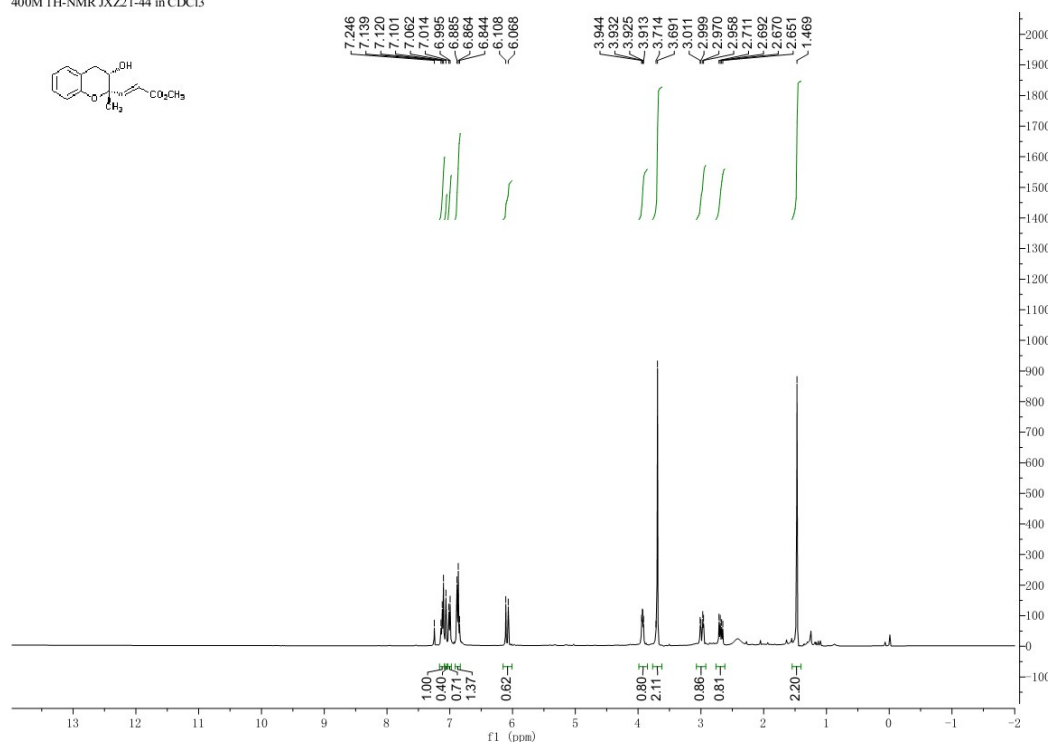

<sup>1</sup>H NMR spectra of compound 8

100M <sup>13</sup>C-NMR JXZ21-44 in CDCl<sub>3</sub>

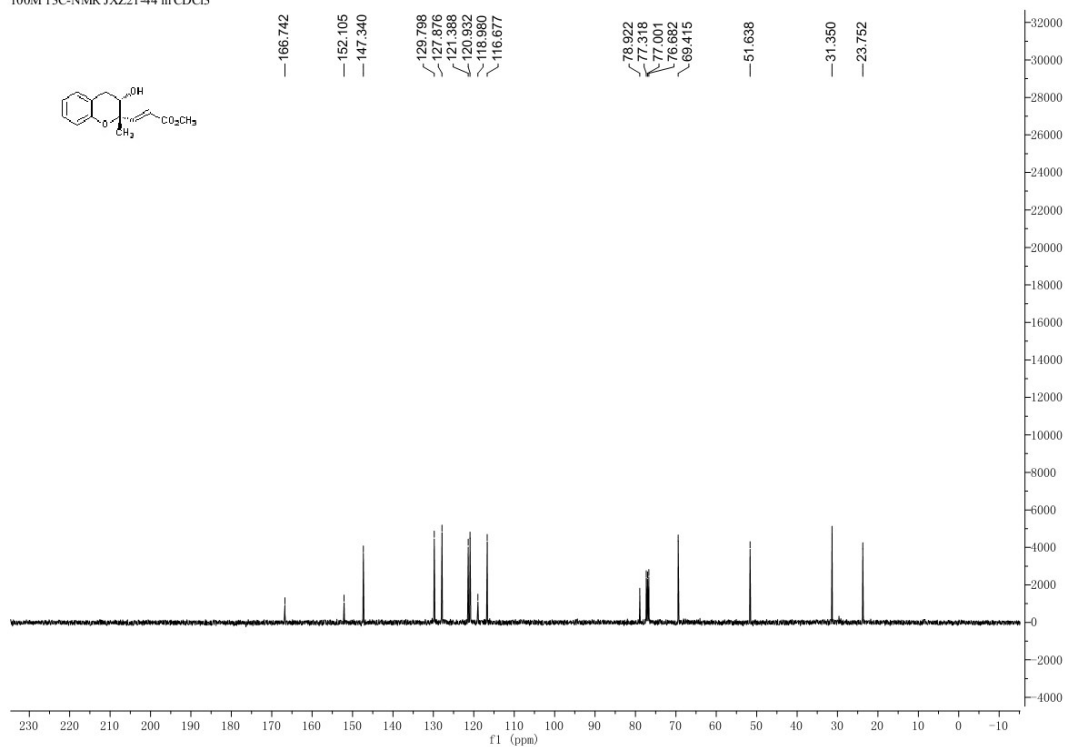

<sup>13</sup>C NMR spectra of compound 8

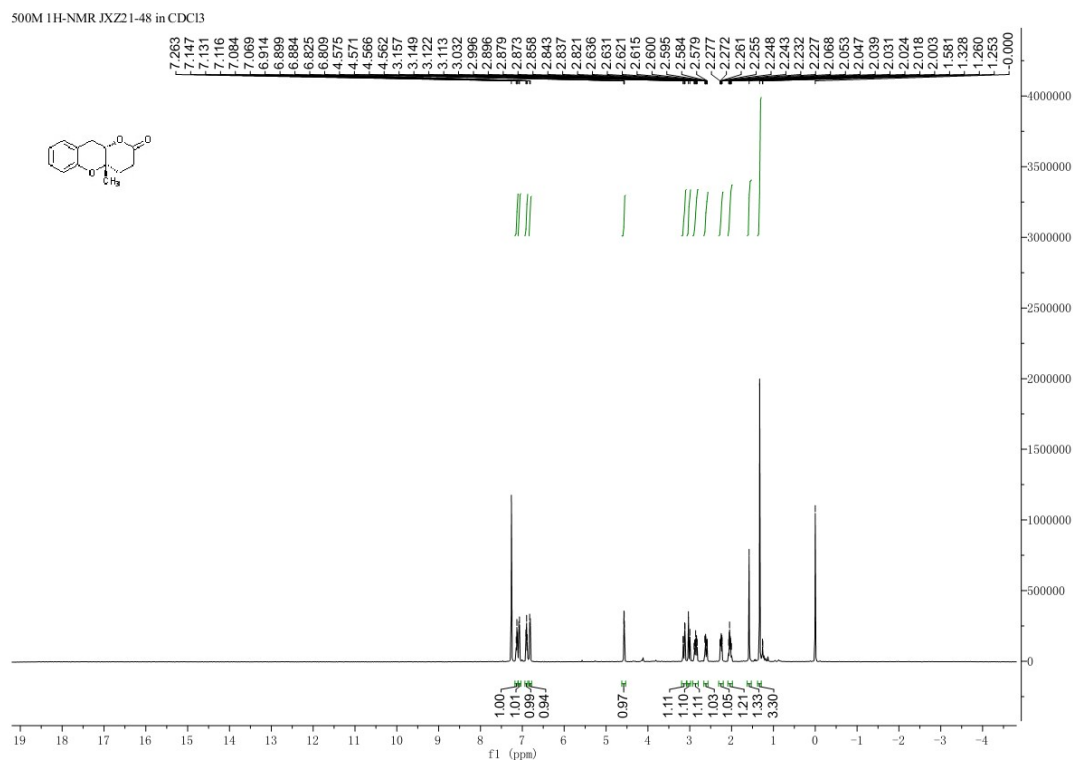

$^1\text{H}$  NMR spectra of compound 9

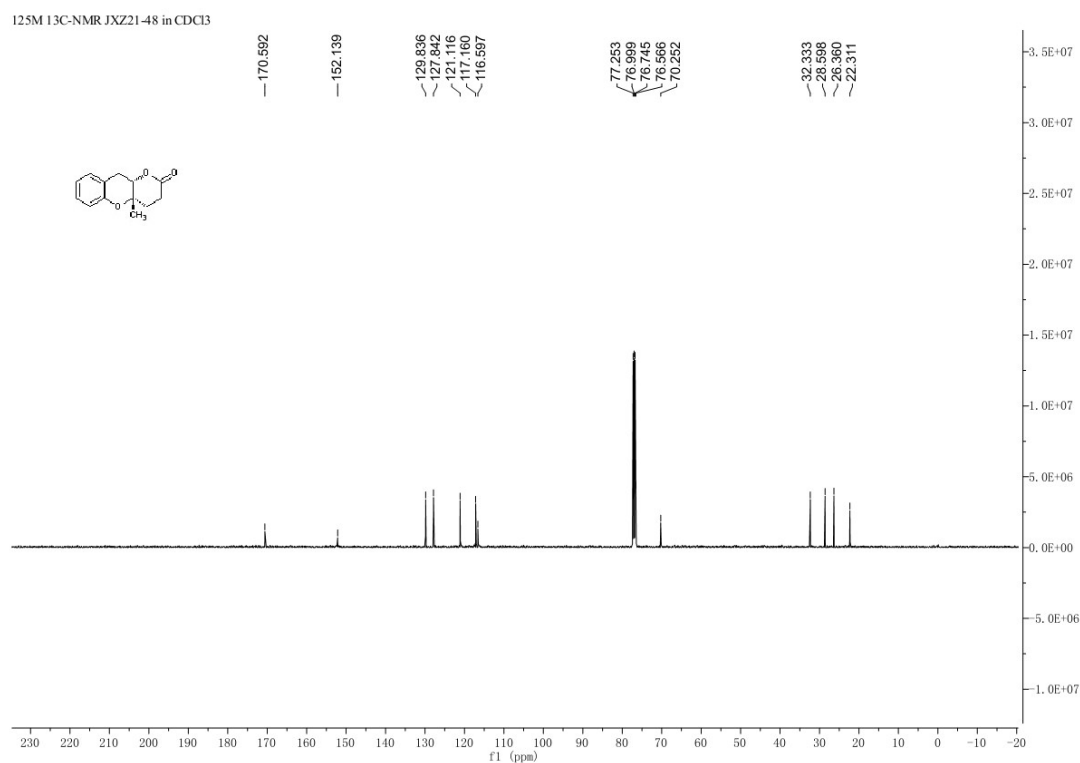

$^{13}\text{C}$  NMR spectra of compound 9

400M <sup>1</sup>H-NMR JXZ21-49 in CDCl<sub>3</sub>

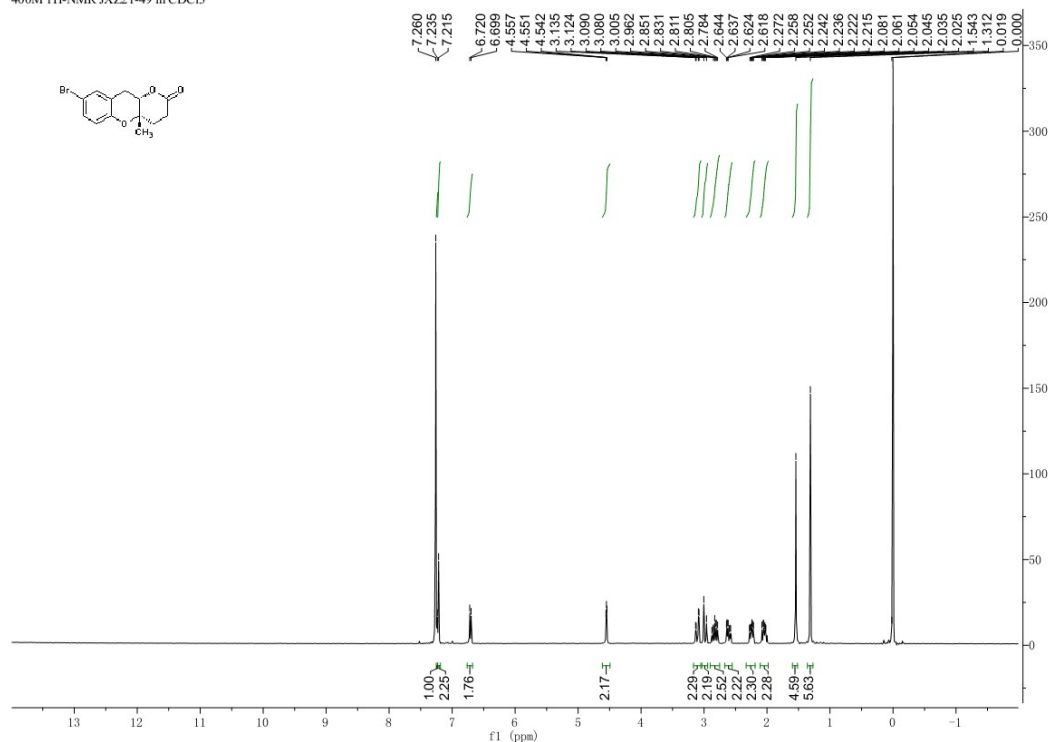

<sup>1</sup>H NMR spectra of compound 10

100M <sup>13</sup>C-NMR JXZ21-49 in CDCl<sub>3</sub>

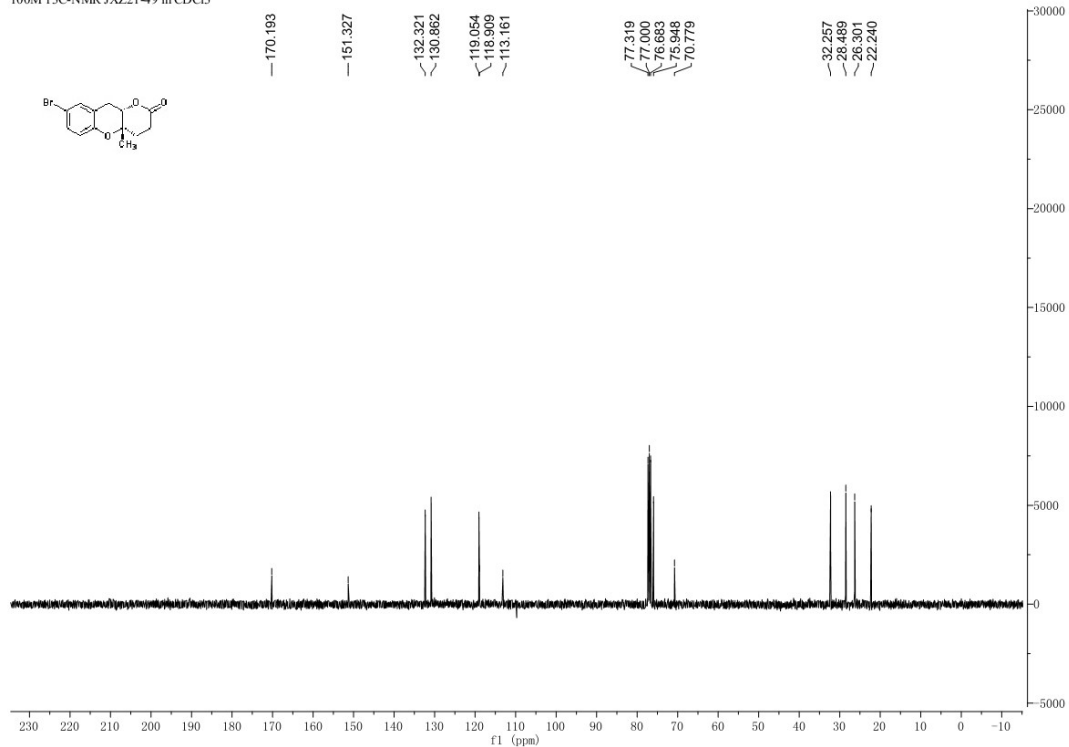

<sup>13</sup>C NMR spectra of compound 10

500M  $^1\text{H}$ -NMR JXZ21-50 in  $\text{CDCl}_3$

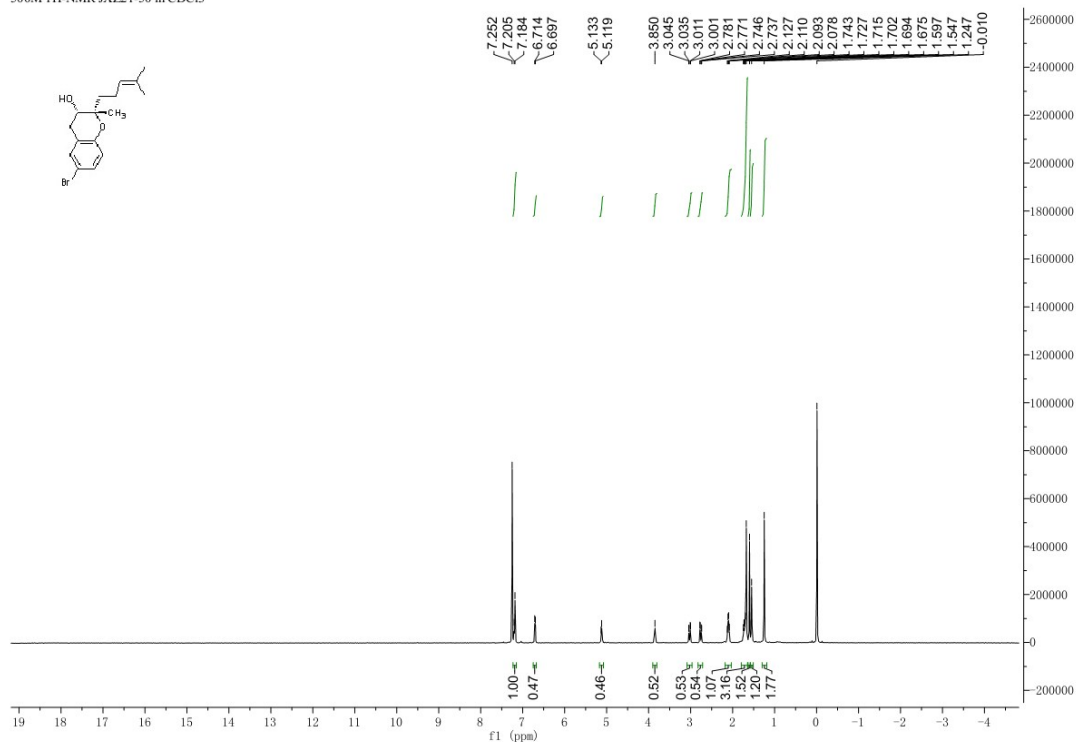

$^1\text{H}$  NMR spectra of compound 11

125M  $^{13}\text{C}$ -NMR JXZ21-50 in  $\text{CDCl}_3$

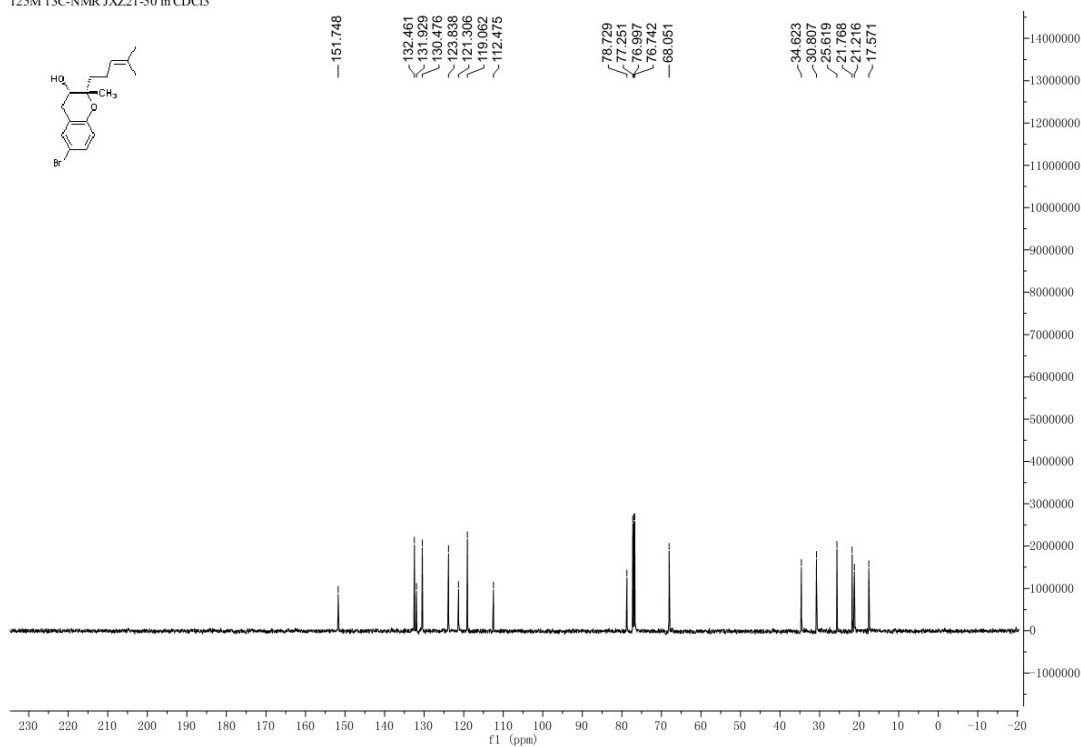

$^{13}\text{C}$  NMR spectra of compound 11

400M <sup>1</sup>H-NMR JXZ22-3 in CDCl<sub>3</sub>

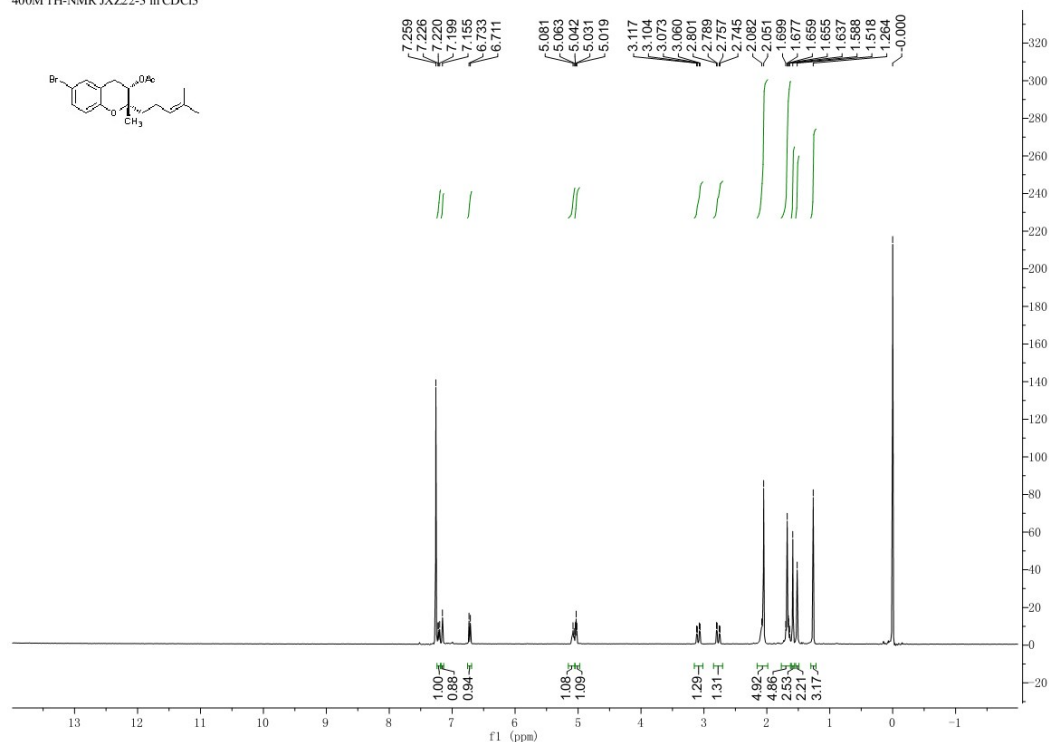

<sup>1</sup>H NMR spectra of compound 12

100M <sup>13</sup>C-NMR JXZ22-3 in CDCl<sub>3</sub>

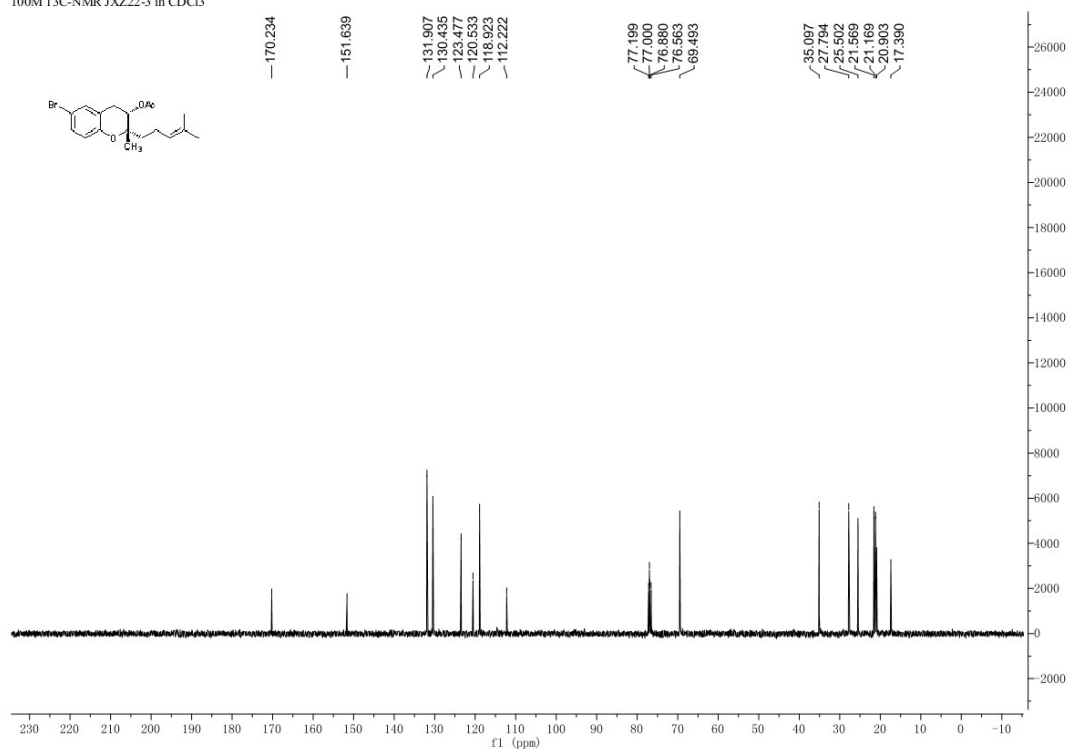

<sup>13</sup>C NMR spectra of compound 12

400M <sup>1</sup>H-NMR JXZ22-5-2 in CDCl<sub>3</sub>

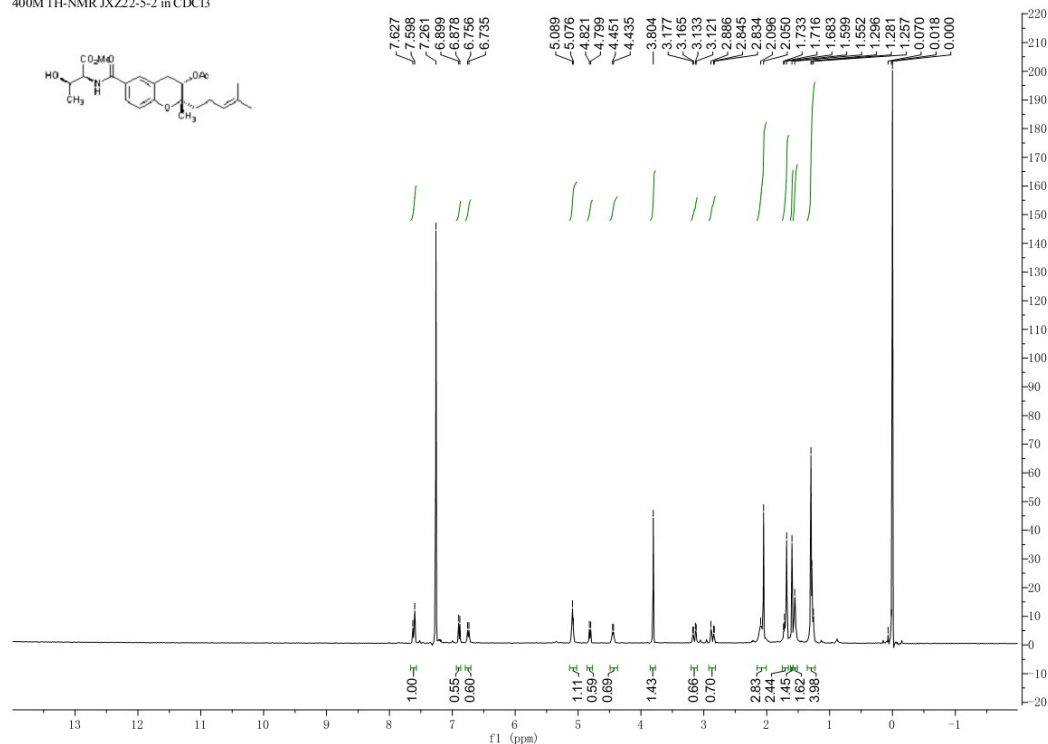

<sup>1</sup>H NMR spectra of compound 13

100M <sup>13</sup>C-NMR JXZ22-5-2 in CDCl<sub>3</sub>

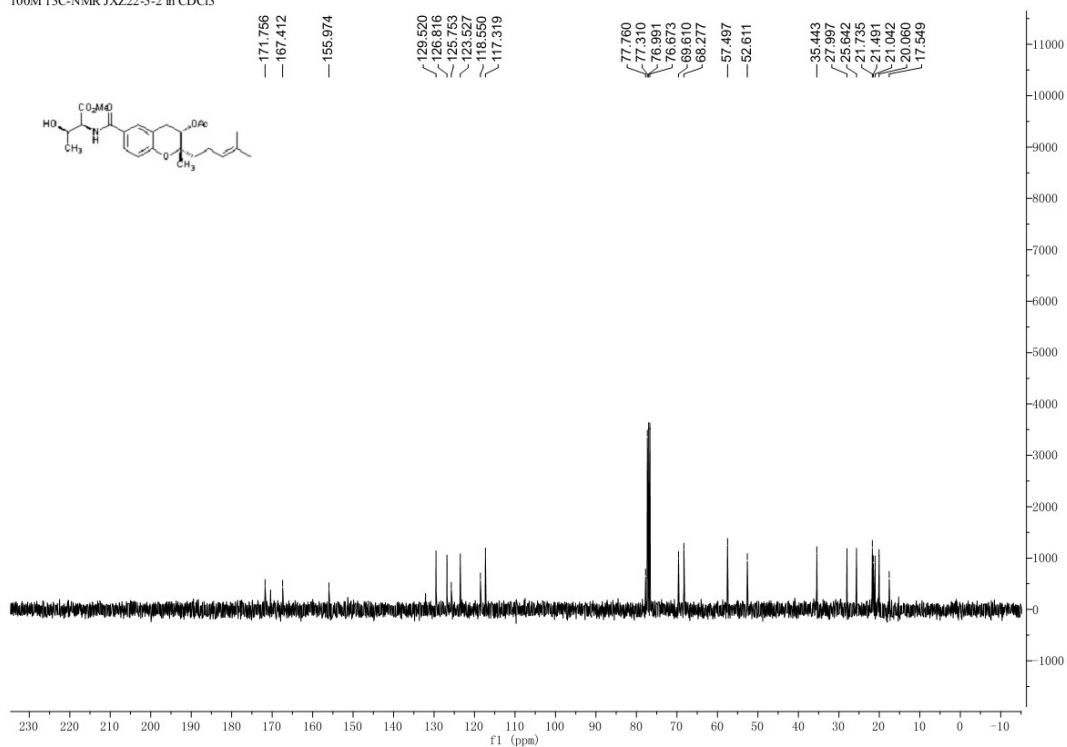

<sup>13</sup>C NMR spectra of compound 13

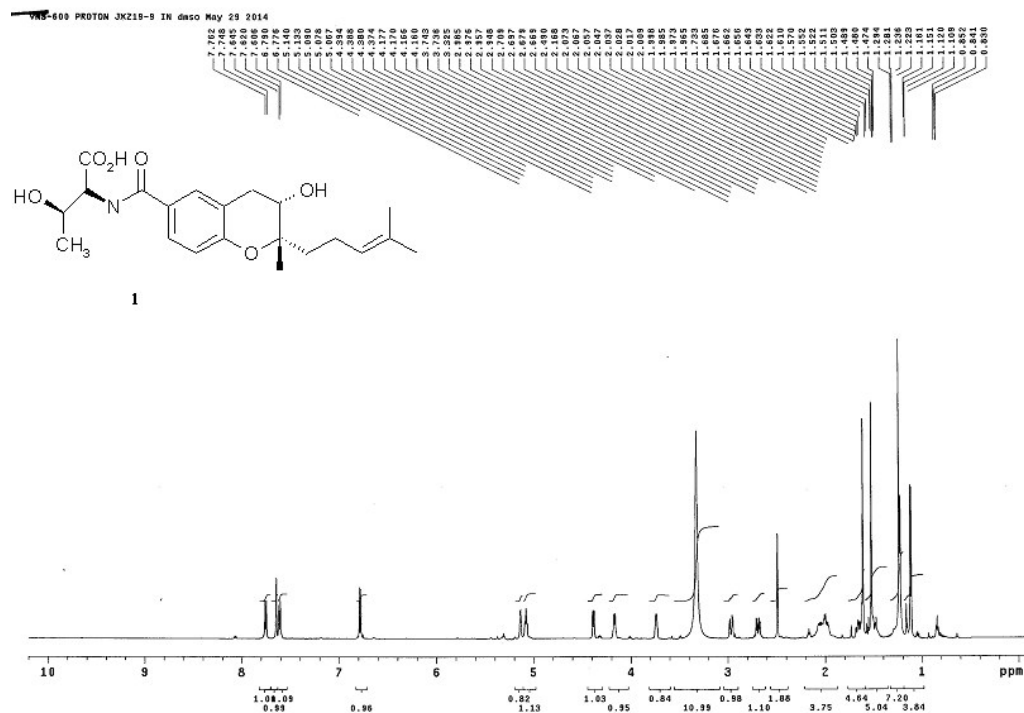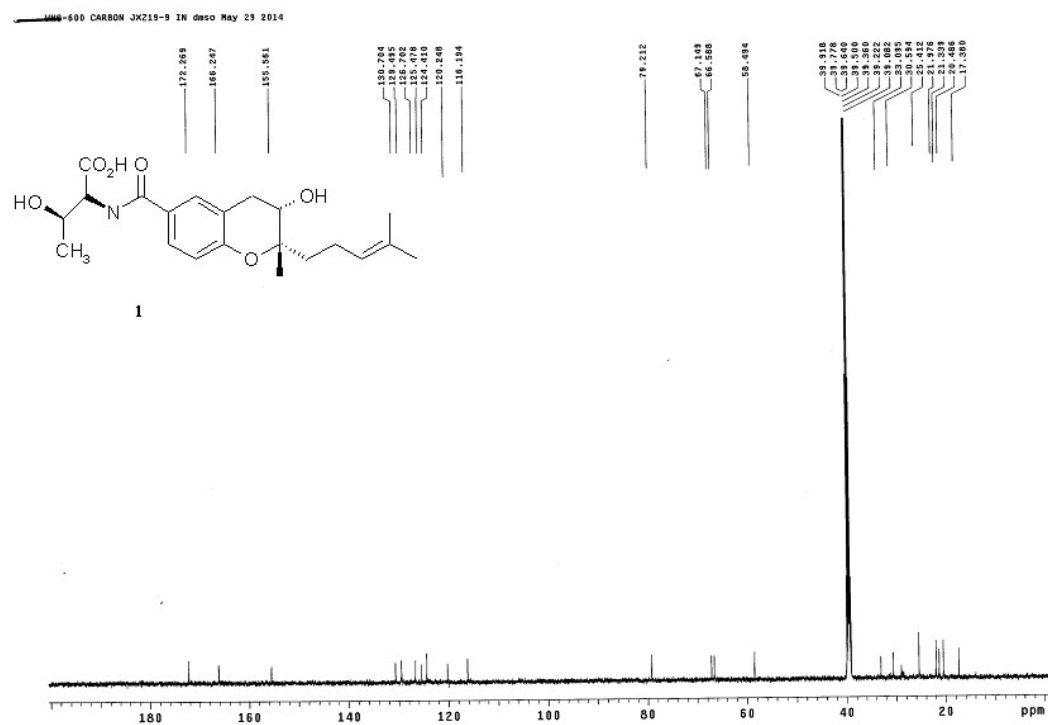



Chemical structure: CC(=C(C1=CC=C(C=C1)OC2=CC=CC=C2)C(=O)OCC

<sup>1</sup>H NMR spectrum (CDCl<sub>3</sub>) showing peaks and integration values:

| Chemical Shift (ppm)                                                                                                                                                                                                                                                                                                                                                                                                                                                                                                                                                                                                                                                                                                                                                                                                                                                                                                                                                                                                                                                                                                                                                                                                                                                                                                                                                                                                                                                                                                                                                                                                                                                                                                                                                                                                                                                                                                                                                                                                                                                                                                                                                                                                                                                                                                                                                                                                                                                                                                                                                                                                                                                                                                                                                                                                                                                                                                                                                                                                                                                                                                                                                                                                                                                                                                                                                                                                                                                                                                                                                                                                                                                                                                                                                                                                                                                                                                                                                                                                                                                            | Integration |
|---------------------------------------------------------------------------------------------------------------------------------------------------------------------------------------------------------------------------------------------------------------------------------------------------------------------------------------------------------------------------------------------------------------------------------------------------------------------------------------------------------------------------------------------------------------------------------------------------------------------------------------------------------------------------------------------------------------------------------------------------------------------------------------------------------------------------------------------------------------------------------------------------------------------------------------------------------------------------------------------------------------------------------------------------------------------------------------------------------------------------------------------------------------------------------------------------------------------------------------------------------------------------------------------------------------------------------------------------------------------------------------------------------------------------------------------------------------------------------------------------------------------------------------------------------------------------------------------------------------------------------------------------------------------------------------------------------------------------------------------------------------------------------------------------------------------------------------------------------------------------------------------------------------------------------------------------------------------------------------------------------------------------------------------------------------------------------------------------------------------------------------------------------------------------------------------------------------------------------------------------------------------------------------------------------------------------------------------------------------------------------------------------------------------------------------------------------------------------------------------------------------------------------------------------------------------------------------------------------------------------------------------------------------------------------------------------------------------------------------------------------------------------------------------------------------------------------------------------------------------------------------------------------------------------------------------------------------------------------------------------------------------------------------------------------------------------------------------------------------------------------------------------------------------------------------------------------------------------------------------------------------------------------------------------------------------------------------------------------------------------------------------------------------------------------------------------------------------------------------------------------------------------------------------------------------------------------------------------------------------------------------------------------------------------------------------------------------------------------------------------------------------------------------------------------------------------------------------------------------------------------------------------------------------------------------------------------------------------------------------------------------------------------------------------------------------------------|-------------|
| 7.427, 7.408, 7.377, 7.375, 7.373, 7.371, 7.369, 7.367, 7.365, 7.363, 7.361, 7.359, 7.357, 7.355, 7.353, 7.351, 7.349, 7.347, 7.345, 7.343, 7.341, 7.339, 7.337, 7.335, 7.333, 7.331, 7.329, 7.327, 7.325, 7.323, 7.321, 7.319, 7.317, 7.315, 7.313, 7.311, 7.309, 7.307, 7.305, 7.303, 7.301, 7.299, 7.297, 7.295, 7.293, 7.291, 7.289, 7.287, 7.285, 7.283, 7.281, 7.279, 7.277, 7.275, 7.273, 7.271, 7.269, 7.267, 7.265, 7.263, 7.261, 7.259, 7.257, 7.255, 7.253, 7.251, 7.249, 7.247, 7.245, 7.243, 7.241, 7.239, 7.237, 7.235, 7.233, 7.231, 7.229, 7.227, 7.225, 7.223, 7.221, 7.219, 7.217, 7.215, 7.213, 7.211, 7.209, 7.207, 7.205, 7.203, 7.201, 7.199, 7.197, 7.195, 7.193, 7.191, 7.189, 7.187, 7.185, 7.183, 7.181, 7.179, 7.177, 7.175, 7.173, 7.171, 7.169, 7.167, 7.165, 7.163, 7.161, 7.159, 7.157, 7.155, 7.153, 7.151, 7.149, 7.147, 7.145, 7.143, 7.141, 7.139, 7.137, 7.135, 7.133, 7.131, 7.129, 7.127, 7.125, 7.123, 7.121, 7.119, 7.117, 7.115, 7.113, 7.111, 7.109, 7.107, 7.105, 7.103, 7.101, 7.099, 7.097, 7.095, 7.093, 7.091, 7.089, 7.087, 7.085, 7.083, 7.081, 7.079, 7.077, 7.075, 7.073, 7.071, 7.069, 7.067, 7.065, 7.063, 7.061, 7.059, 7.057, 7.055, 7.053, 7.051, 7.049, 7.047, 7.045, 7.043, 7.041, 7.039, 7.037, 7.035, 7.033, 7.031, 7.029, 7.027, 7.025, 7.023, 7.021, 7.019, 7.017, 7.015, 7.013, 7.011, 7.009, 7.007, 7.005, 7.003, 7.001, 6.999, 6.997, 6.995, 6.993, 6.991, 6.989, 6.987, 6.985, 6.983, 6.981, 6.979, 6.977, 6.975, 6.973, 6.971, 6.969, 6.967, 6.965, 6.963, 6.961, 6.959, 6.957, 6.955, 6.953, 6.951, 6.949, 6.947, 6.945, 6.943, 6.941, 6.939, 6.937, 6.935, 6.933, 6.931, 6.929, 6.927, 6.925, 6.923, 6.921, 6.919, 6.917, 6.915, 6.913, 6.911, 6.909, 6.907, 6.905, 6.903, 6.901, 6.899, 6.897, 6.895, 6.893, 6.891, 6.889, 6.887, 6.885, 6.883, 6.881, 6.879, 6.877, 6.875, 6.873, 6.871, 6.869, 6.867, 6.865, 6.863, 6.861, 6.859, 6.857, 6.855, 6.853, 6.851, 6.849, 6.847, 6.845, 6.843, 6.841, 6.839, 6.837, 6.835, 6.833, 6.831, 6.829, 6.827, 6.825, 6.823, 6.821, 6.819, 6.817, 6.815, 6.813, 6.811, 6.809, 6.807, 6.805, 6.803, 6.801, 6.799, 6.797, 6.795, 6.793, 6.791, 6.789, 6.787, 6.785, 6.783, 6.781, 6.779, 6.777, 6.775, 6.773, 6.771, 6.769, 6.767, 6.765, 6.763, 6.761, 6.759, 6.757, 6.755, 6.753, 6.751, 6.749, 6.747, 6.745, 6.743, 6.741, 6.739, 6.737, 6.735, 6.733, 6.731, 6.729, 6.727, 6.725, 6.723, 6.721, 6.719, 6.717, 6.715, 6.713, 6.711, 6.709, 6.707, 6.705, 6.703, 6.701, 6.699, 6.697, 6.695, 6.693, 6.691, 6.689, 6.687, 6.685, 6.683, 6.681, 6.679, 6.677, 6.675, 6.673, 6.671, 6.669, 6.667, 6.665, 6.663, 6.661, 6.659, 6.657, 6.655, 6.653, 6.651, 6.649, 6.647, 6.645, 6.643, 6.641, 6.639, 6.637, 6.635, 6.633, 6.631, 6.629, 6.627, 6.625, 6.623, 6.621, 6.619, 6.617, 6.615, 6.613, 6.611, 6.609, 6.607, 6.605, 6.603, 6.601, 6.599, 6.597, 6.595, 6.593, 6.591, 6.589, 6.587, 6.585, 6.583, 6.581, 6.579, 6.577, 6.575, 6.573, 6.571, 6.569, 6.567, 6.565, 6.563, 6.561, 6.559, 6.557, 6.555, 6.553, 6.551, 6.549, 6.547, 6.545, 6.543, 6.541, 6.539, 6.537, 6.535, 6.533, 6.531, 6.529, 6.527, 6.525, 6.523, 6.521, 6.519, 6.517, 6.515, 6.513, 6.511, 6.509, 6.507, 6.505, 6.503, 6.501, 6.499, 6.497, 6.495, 6.493, 6.491, 6.489, 6.487, 6.485, 6.483, 6.481, 6.479, 6.477, 6.475, 6.473, 6.471, 6.469, 6.467, 6.465, 6.463, 6.461, 6.459, 6.457, 6.455, 6.453, 6.451, 6.449, 6.447, 6.445, 6.443, 6.441, 6.439, 6.437, 6.435, 6.433, 6.431, 6.429, 6.427, 6.425, 6.423, 6.421, 6.419, 6.417, 6.415, 6.413, 6.411, 6.409, 6.407, 6.405, 6.403, 6.401, 6.399, 6.397, 6.395, 6.393, 6.391, 6.389, 6.387, 6.385, 6.383, 6.381, 6.379, 6.377, 6.375, 6.373, 6.371, 6.369, 6.367, 6.365, 6.363, 6.361, 6.359, 6.357, 6.355, 6.353, 6.351, 6.349, 6.347, 6.345, 6.343, 6.341, 6.339, 6.337, 6.335, 6.333, 6.331, 6.329, 6.327, 6.325, 6.323, 6.321, 6.319, 6.317, 6.315, 6.313, 6.311, 6.309, 6.307, 6.305, 6.303, 6.301, 6.299, 6.297, 6.295, 6.293, 6.291, 6.289, 6.287, 6.285, 6.283, 6.281, 6.279, 6.277, 6.275, 6.273, 6.271, 6.269, 6.267, 6.265, 6.263, |             |

100M <sup>13</sup>C-NMR JXZ20-36 in CDCl<sub>3</sub>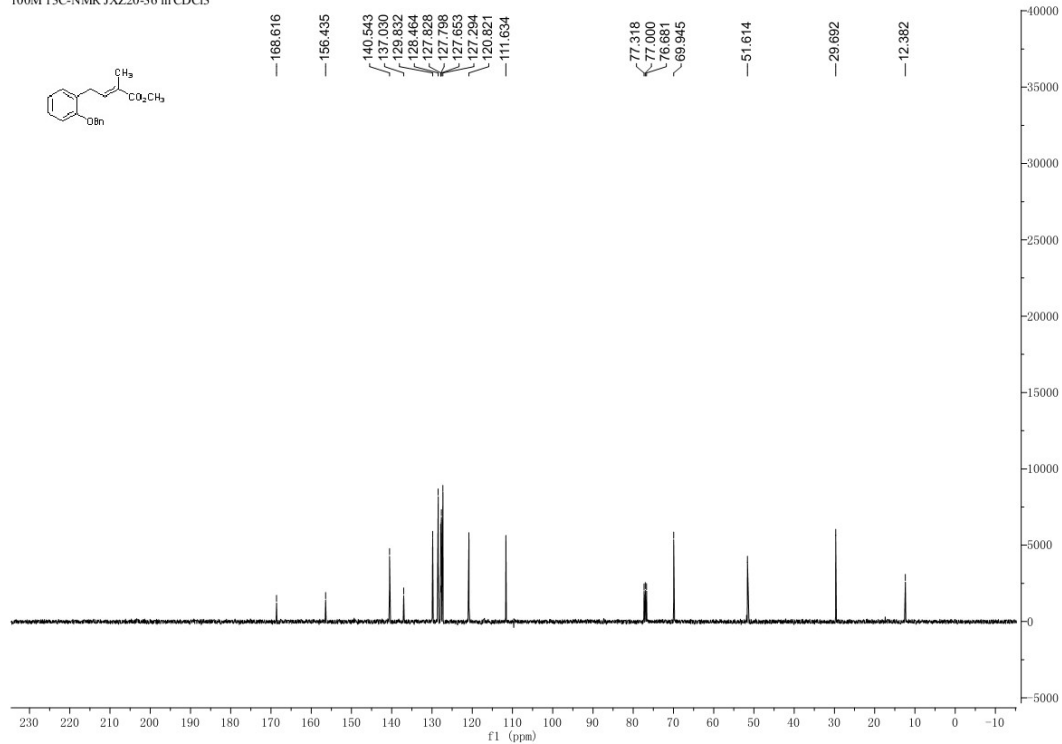

<sup>13</sup>C NMR spectra of compound **14**

400 1H-NMR JXZ20-32 in CDCl3

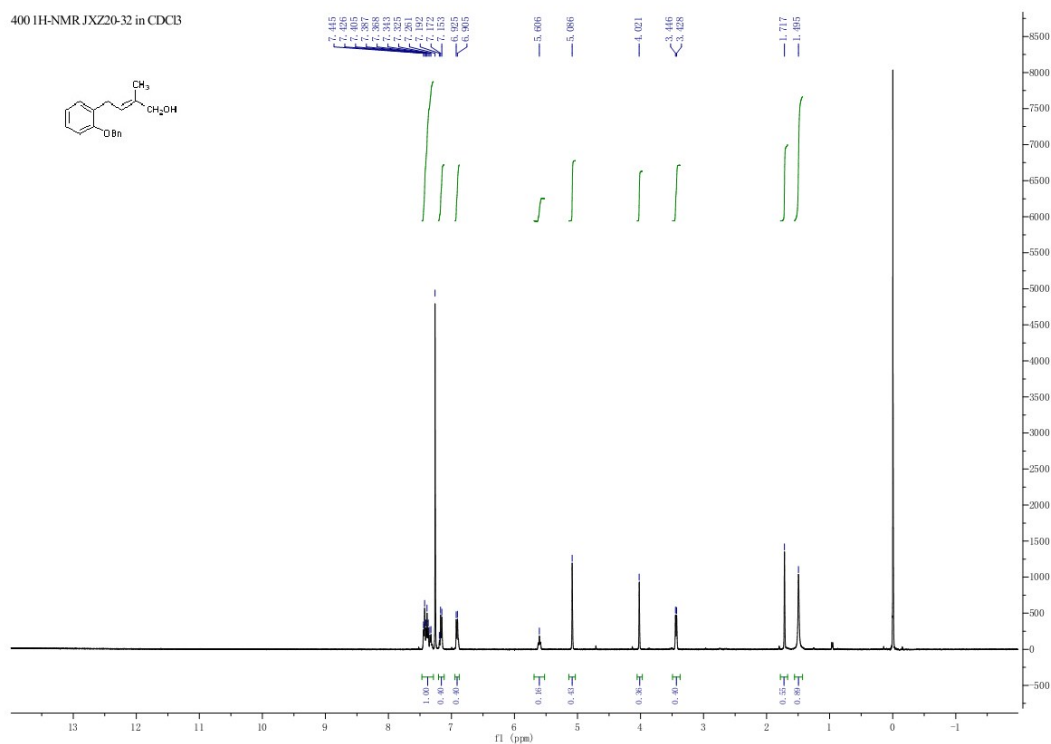

<sup>1</sup>H NMR spectra of compound 15

125M 13C-NMR JXZ20-32 in CDCl3

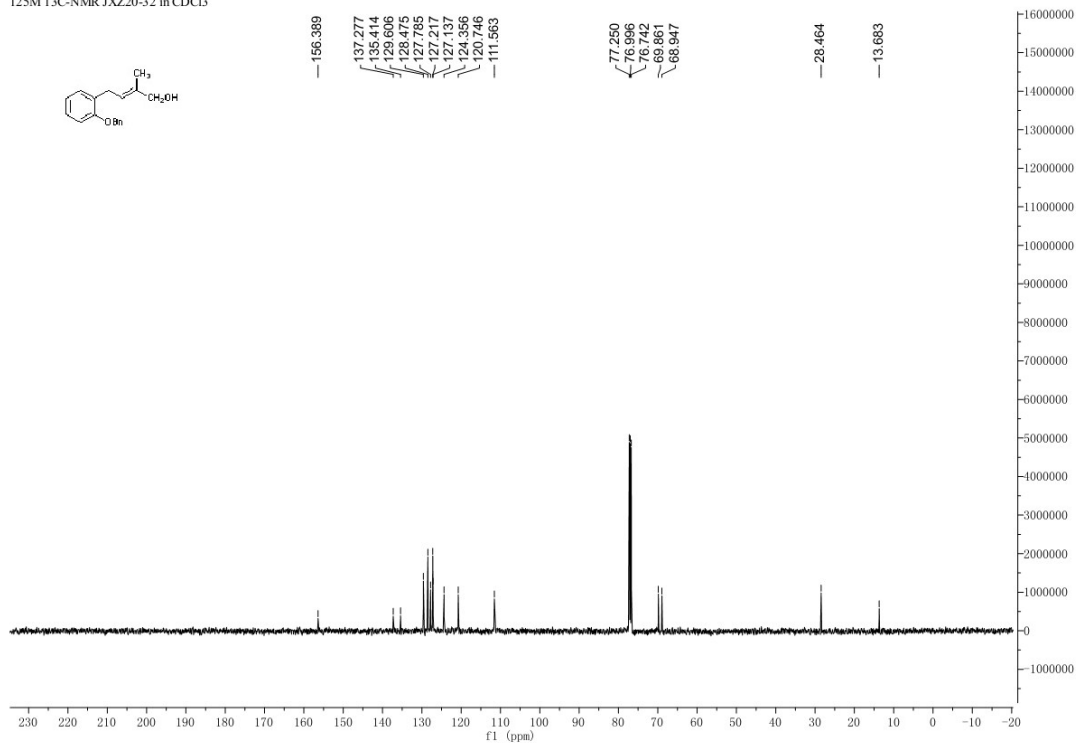

<sup>13</sup>C NMR spectra of compound 15

400M <sup>1</sup>H-NMR JXZ20-35 in CDCl<sub>3</sub>

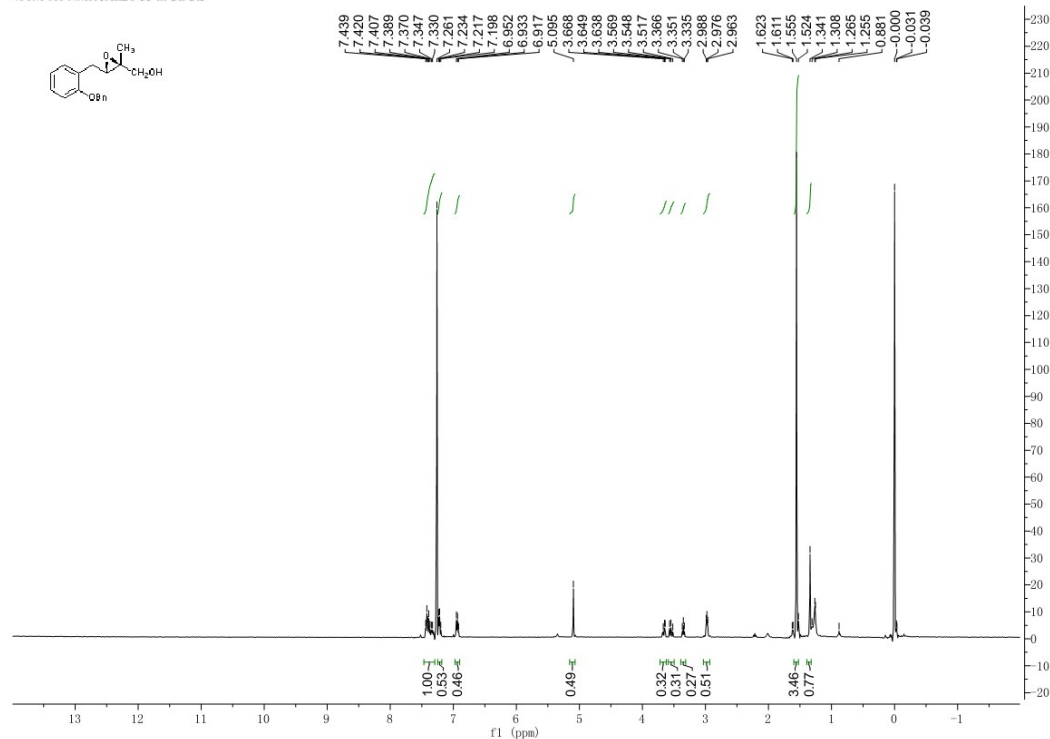

<sup>1</sup>H NMR spectra of compound 16

125M <sup>13</sup>C-NMR JXZ20-35 in CDCl<sub>3</sub>

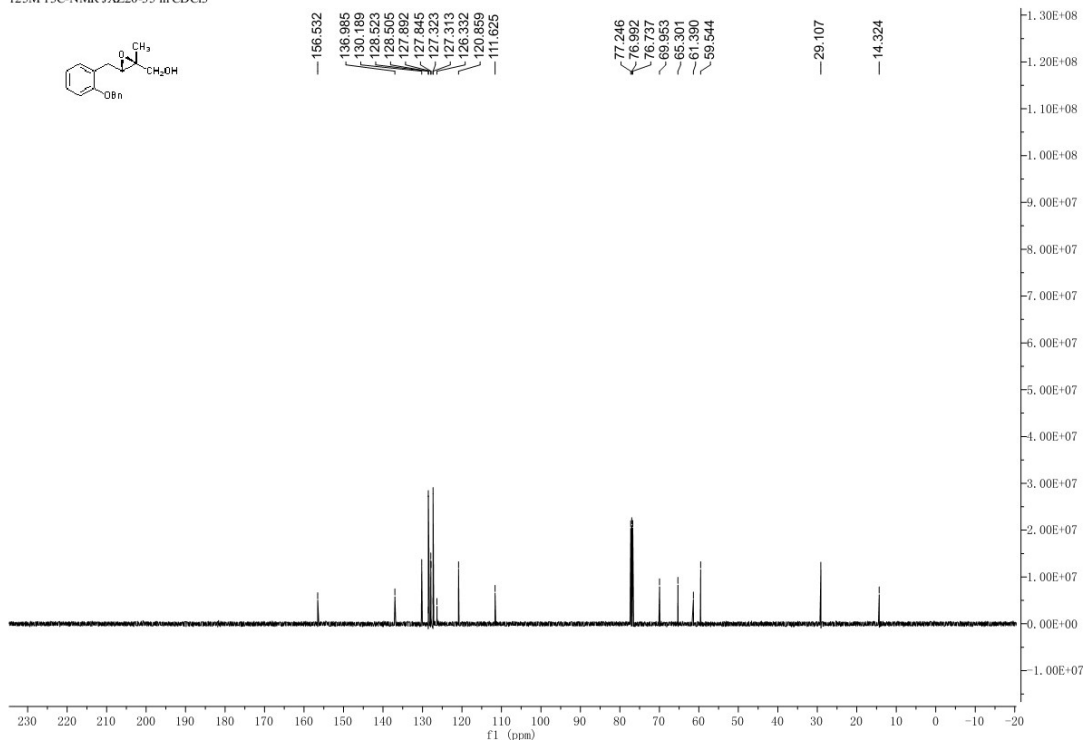

<sup>13</sup>C NMR spectra of compound 16

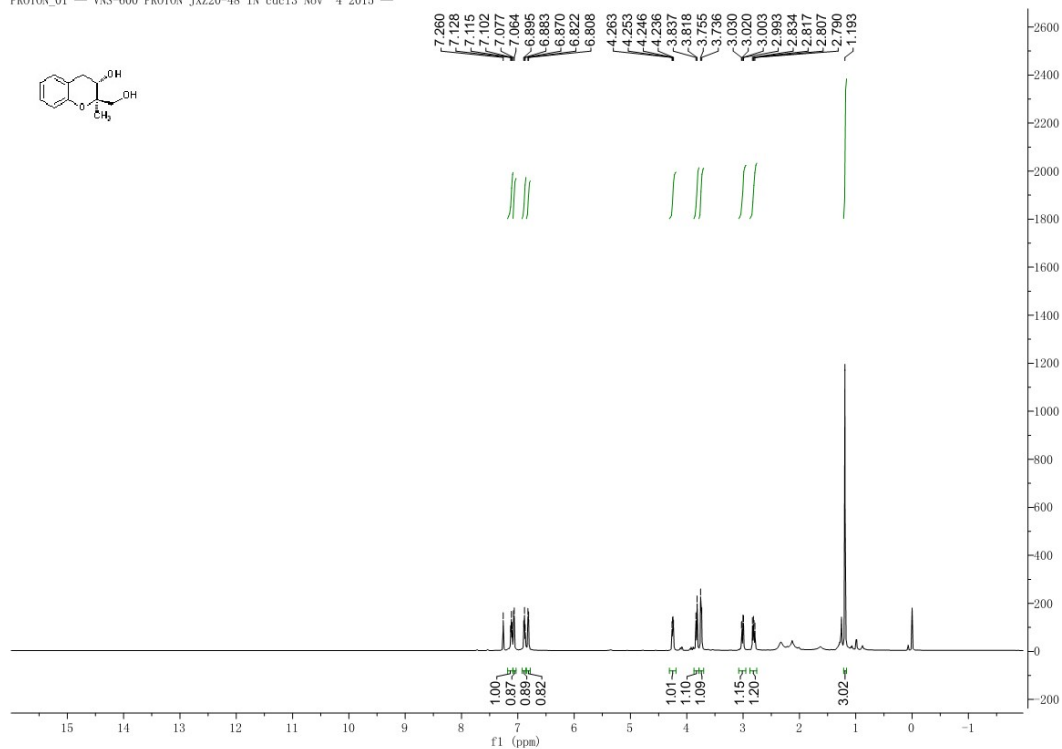

<sup>1</sup>H NMR spectra of compound 17

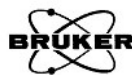

Bruker AVIIIHD 600 20150619  
C13 CDC13 D:\DATA2015 32

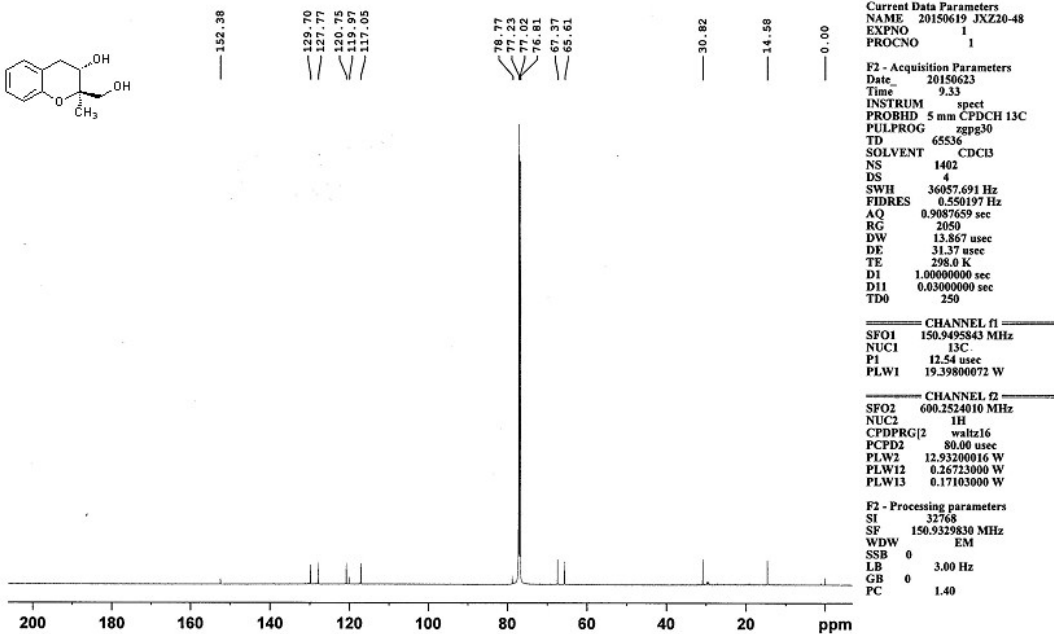

<sup>13</sup>C NMR spectra of compound 17

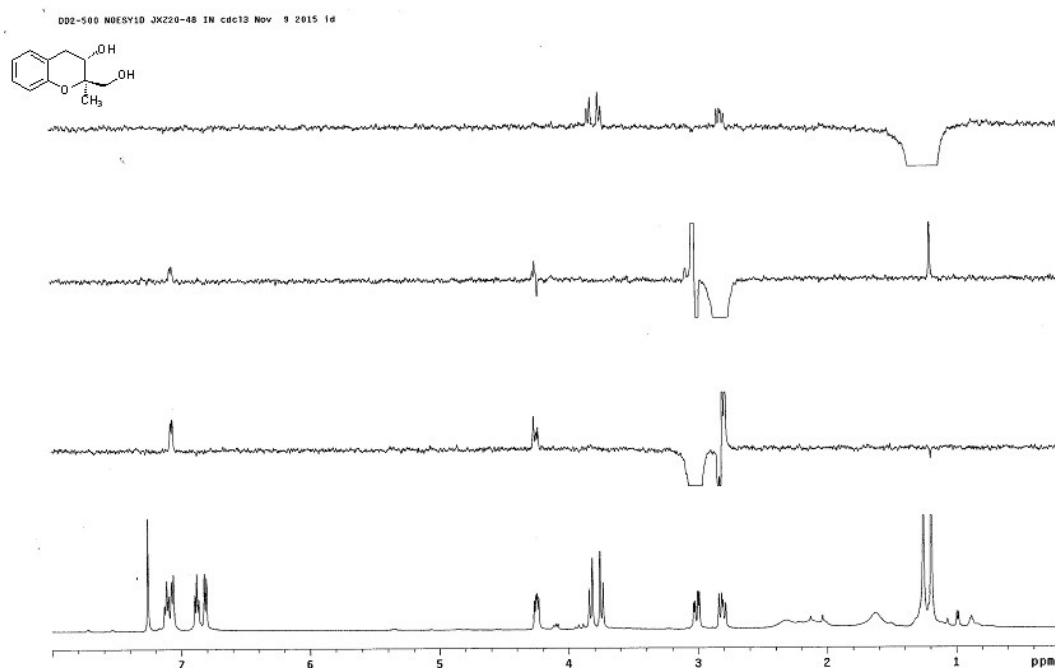

NOE spectra of compound 17

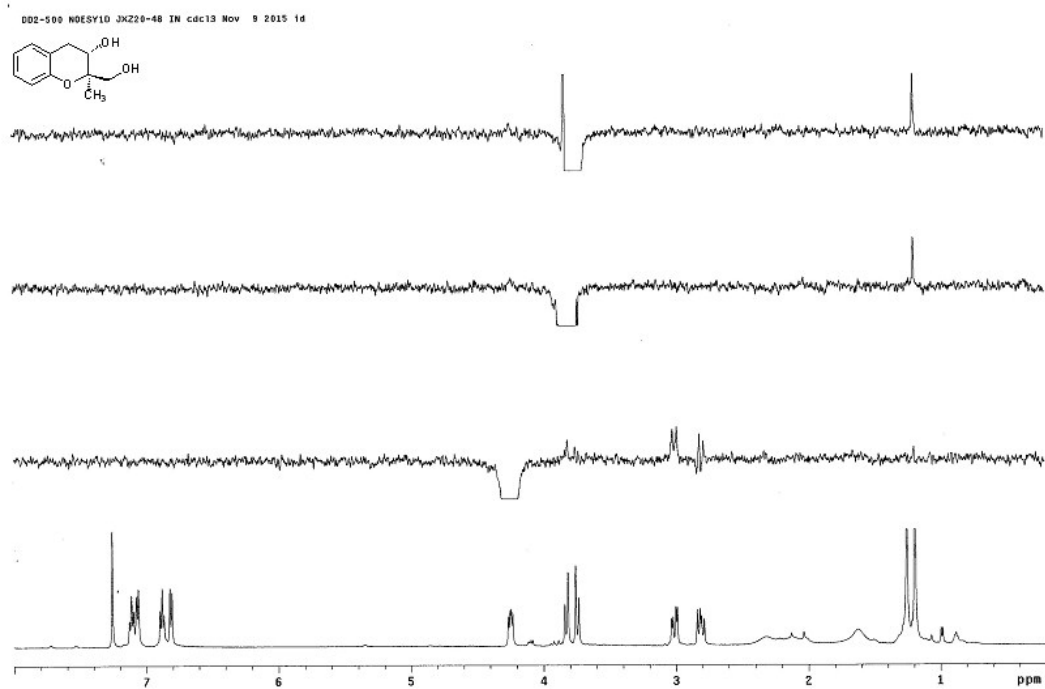

NOE spectra of compound 17



400M <sup>1</sup>H-NMR JXZ21-17 in CDCl<sub>3</sub>

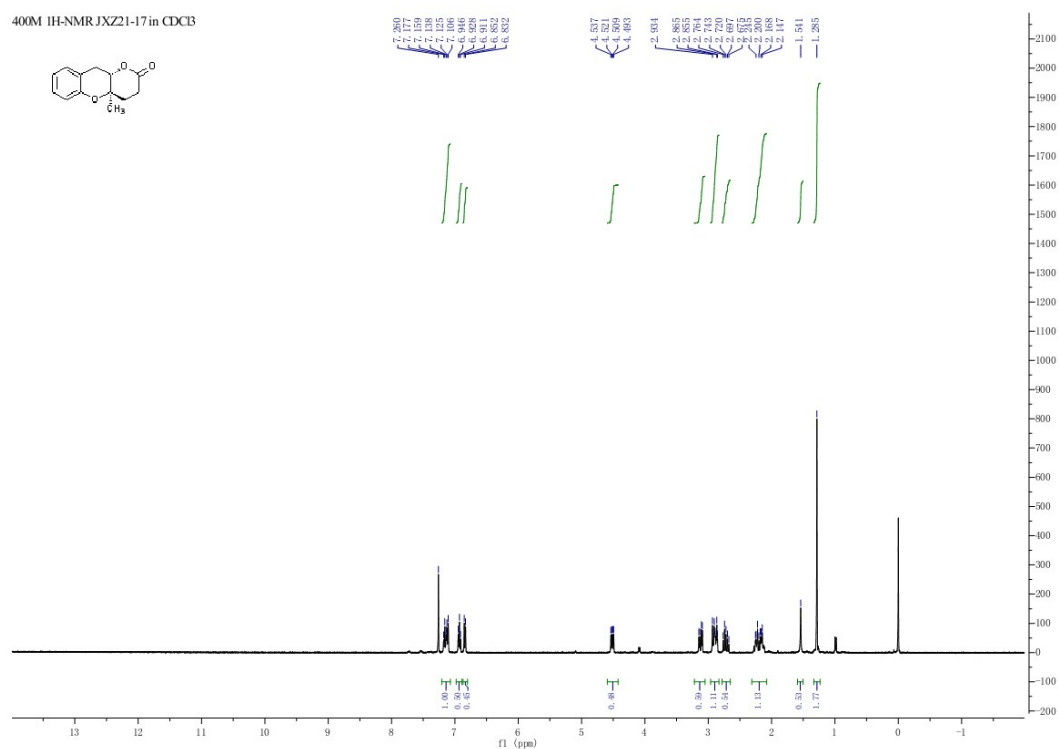

500M <sup>1</sup>H-NMR JXZ21-31 in CDCl<sub>3</sub>

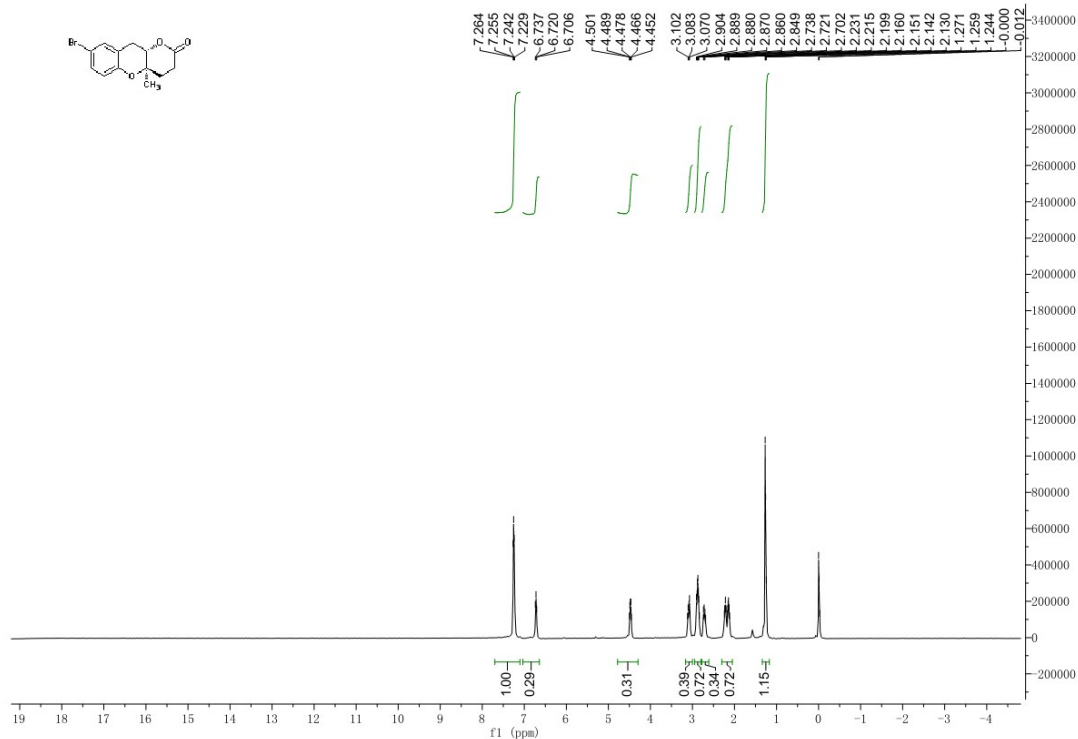

<sup>1</sup>H NMR spectra of compound 20

125M <sup>13</sup>C-NMR JXZ21-31 in CDCl<sub>3</sub>

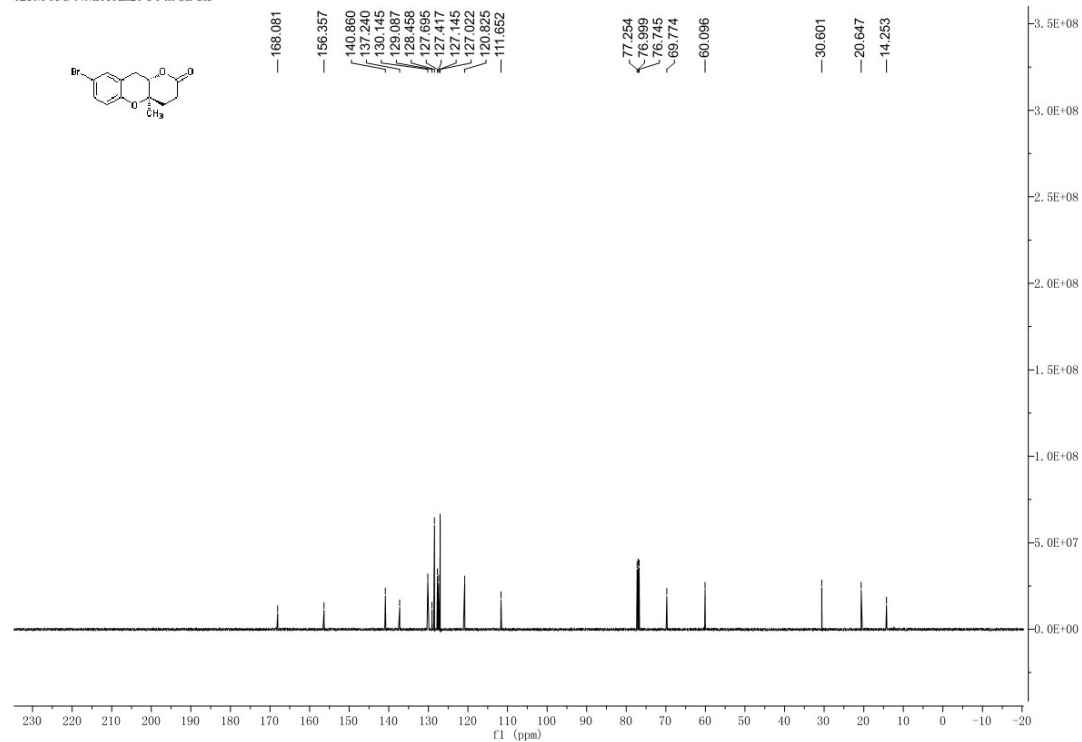

<sup>13</sup>C NMR spectra of compound 20



Bruker AVIIHHD 600 20150528  
PROTON CDCl3 D:\DATA2015 16

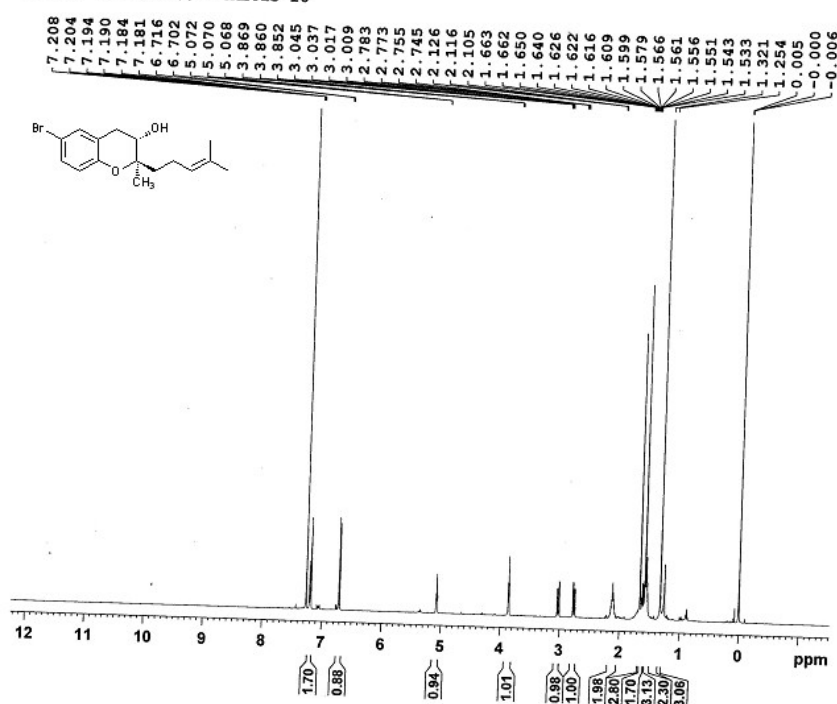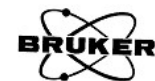

Current Data Parameters  
NAME 20150528 jxx21-25-2  
EXPNO 1  
PROCNO 1

F2 - Acquisition Parameters  
Date\_ 20150528  
Time 10.52  
INSTRUM spect  
PROBHD 5 mm CPDCH 13C  
PULPROG zg30  
TD 65536  
SOLVENT CDCl3  
NS 16  
DS 2  
SWH 12019.230 Hz  
FIDRES 0.103399 Hz  
AQ 2.7262976 sec  
RG 64  
EW 41.600 usec  
DE 20.00 usec  
TE 298.0 K  
D1 1.00000000 sec  
TD0 1

===== CHANNEL f1 =====  
SFO1 600.2537068 MHz  
NUC1 1H  
P1 11.50 usec  
PLW1 12.93200016 W  
F2 - Processing parameters  
SI 65536  
SF 600.2500130 MHz  
WDW EM  
SSB 0  
LB 0.30 Hz  
GB 0  
PC 1.00

<sup>1</sup>H NMR spectra of compound 21

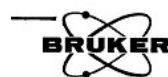

Bruker AVIIHHD 600 20150528  
C13 CDCl3 D:\DATA2015 16

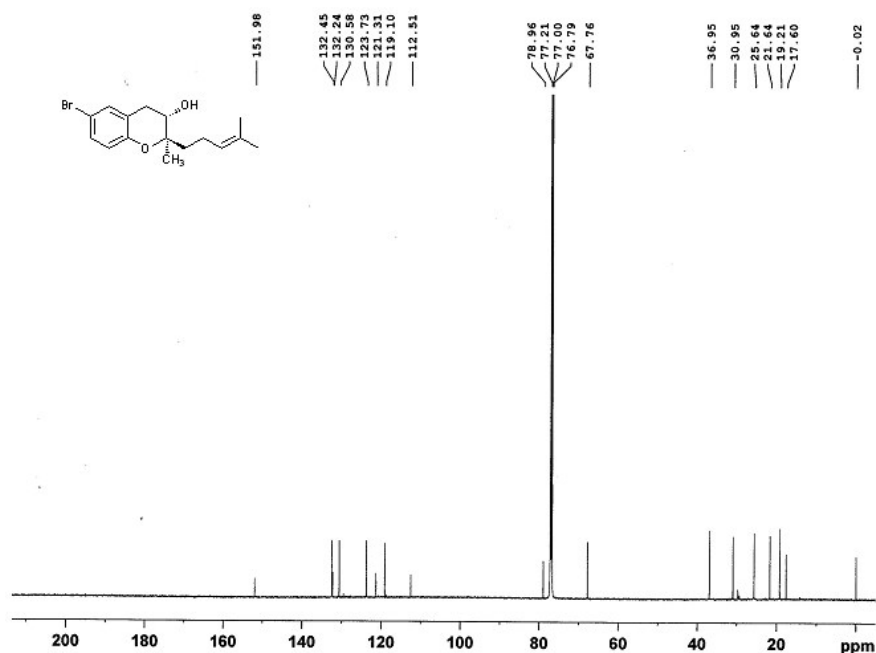

Current Data Parameters  
NAME 20150528 jxx21-25-2  
EXPNO 2  
PROCNO 1

F2 - Acquisition Parameters  
Date\_ 20150528  
Time 10.55  
INSTRUM spect  
PROBHD 5 mm CPDCH 13C  
PULPROG zgpg30  
TD 65536  
SOLVENT CDCl3  
NS 442  
DS 4  
SWH 36057.691 Hz  
FIDRES 0.550197 Hz  
AQ 0.9087659 sec  
RG 2050  
DW 13.867 usec  
DE 31.37 usec  
TE 298.0 K  
D1 1.00000000 sec  
D11 0.03000000 sec  
TD0 150

===== CHANNEL f1 =====  
SFO1 150.9495843 MHz  
NUC1 13C  
P1 12.54 usec  
PLW1 19.39800072 W

===== CHANNEL f2 =====  
SFO2 600.2524010 MHz  
NUC2 1H  
CPDPRG2 waltz16  
PCPD2 80.00 usec  
PLW2 12.93200016 W  
PLW12 0.26723000 W  
PLW13 0.17103000 W

F2 - Processing parameters  
SI 32768  
SF 150.9329849 MHz  
WDW EM  
SSB 0  
LB 2.00 Hz  
GB 0  
PC 1.40

<sup>13</sup>C NMR spectra of compound 21

500M <sup>1</sup>H-NMR JXZ21-33 in CDCl<sub>3</sub>

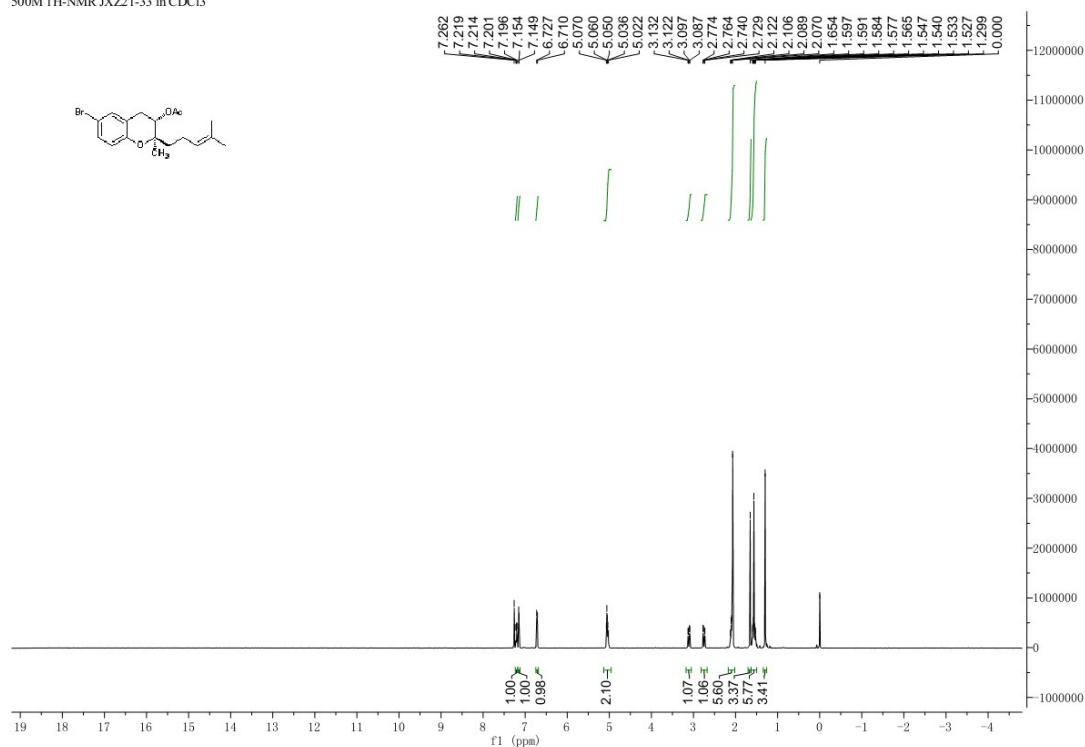

<sup>1</sup>H NMR spectra of compound 22

125M <sup>13</sup>C-NMR JXZ21-33 in CDCl<sub>3</sub>

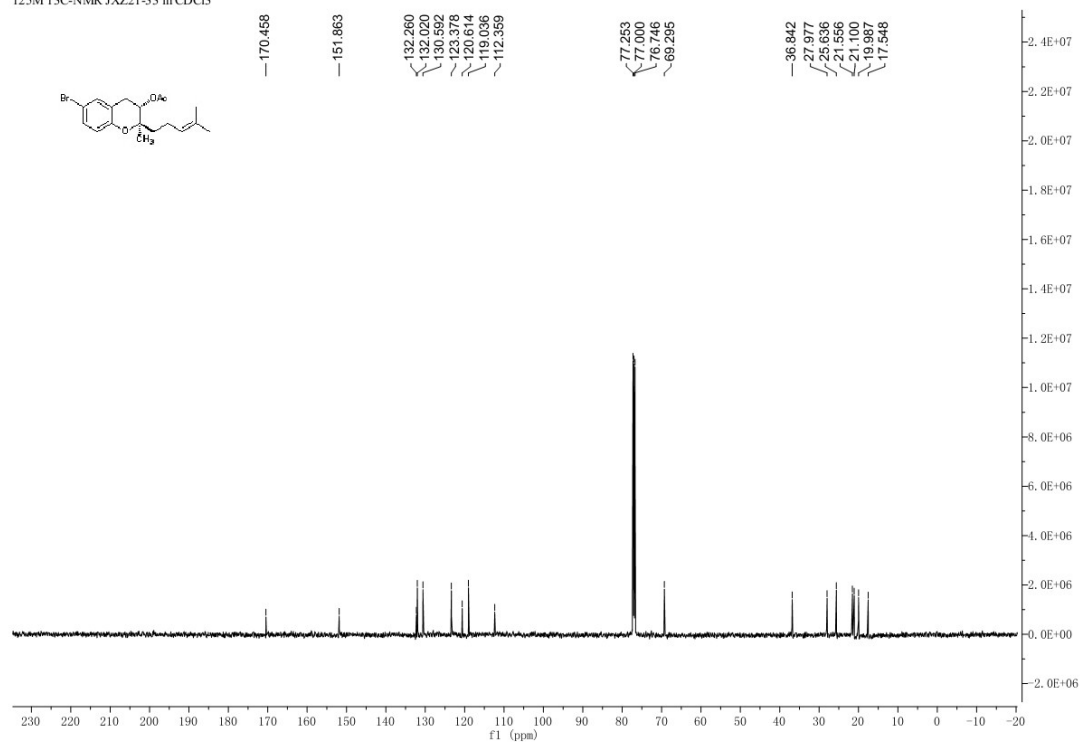

<sup>13</sup>C NMR spectra of compound 22

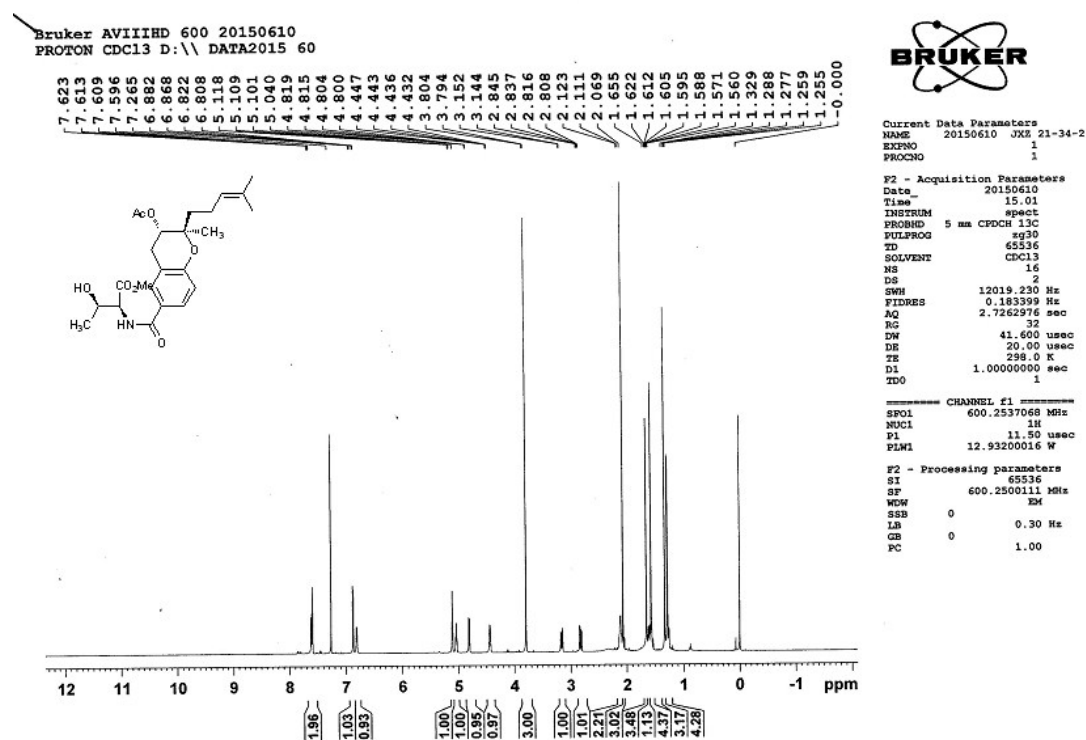

<sup>1</sup>H NMR spectra of compound 23

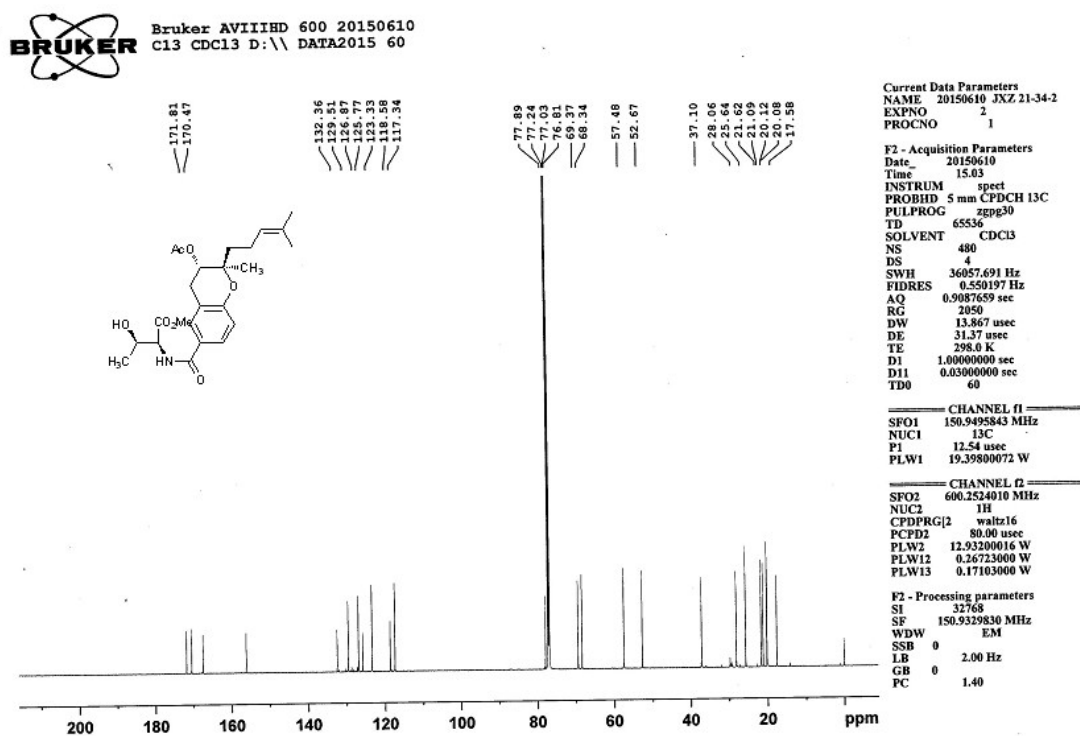

<sup>13</sup>C NMR spectra of compound 23

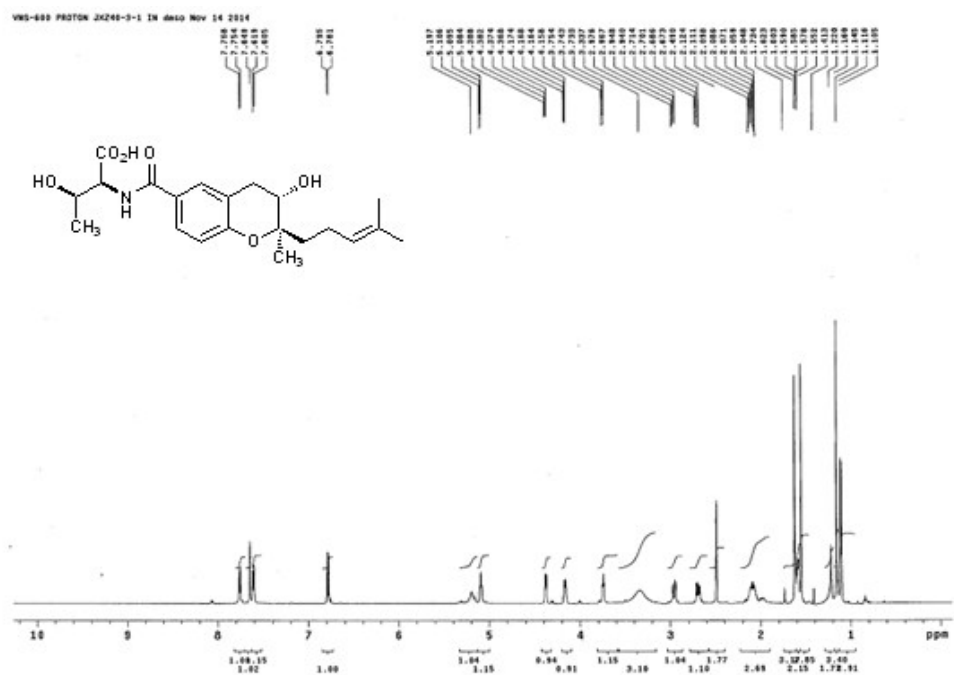

### <sup>1</sup>H NMR spectra of compound **24**

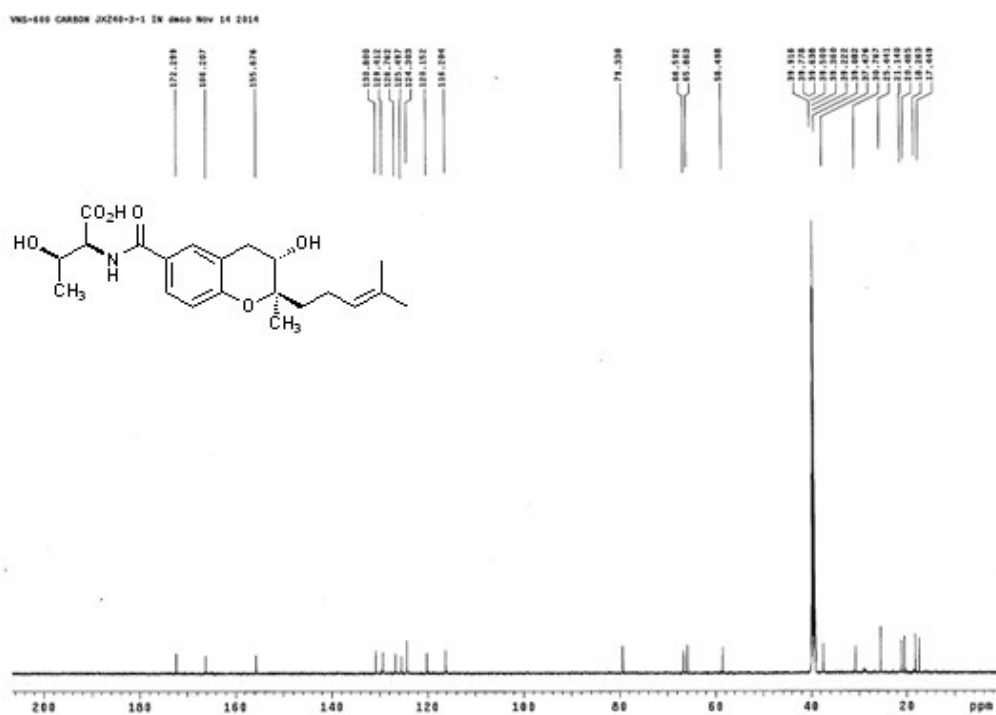<sup>13</sup>C NMR spectra of compound **24**

Compound **1**

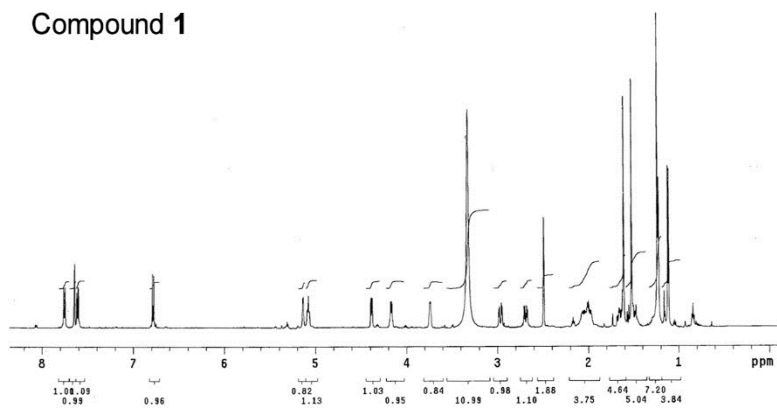

Compound **24**

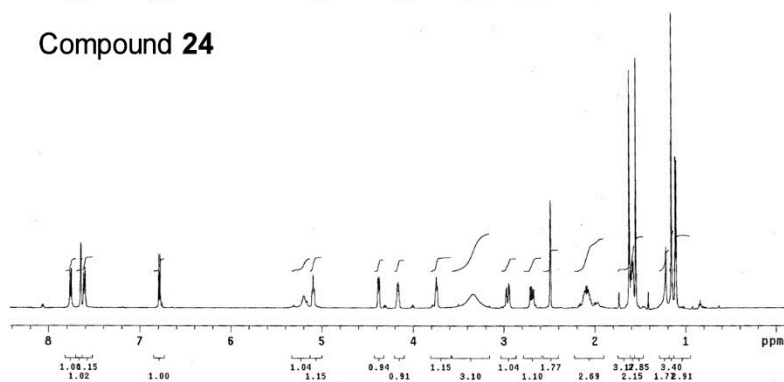

Natural Xiamenmycin A

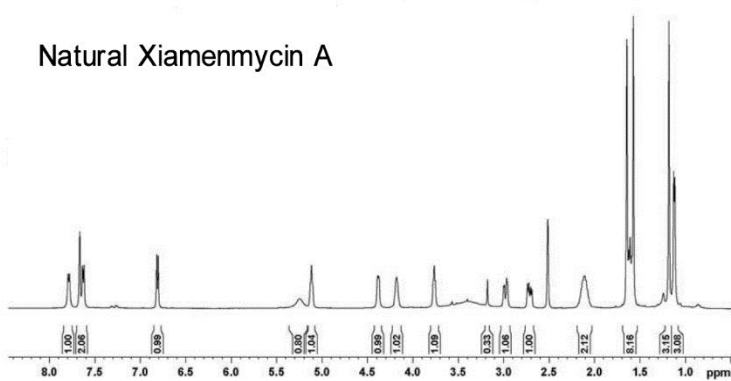

$^1\text{H}$  NMR comparison of **1**, **24** and natural xiamenmycin A

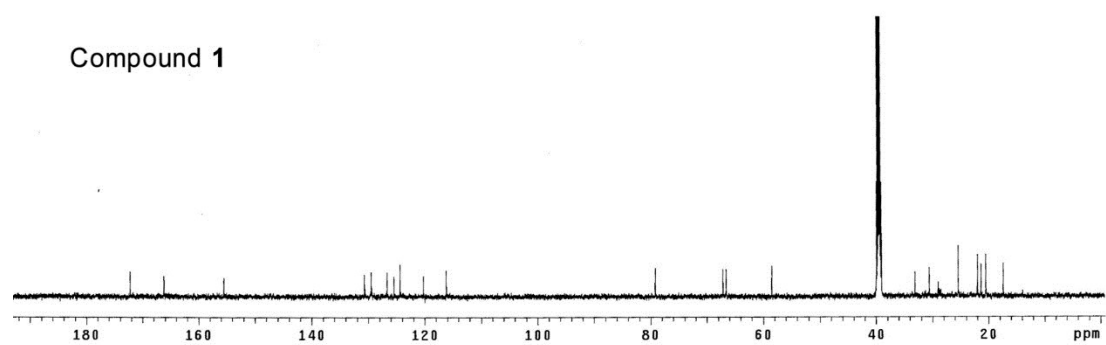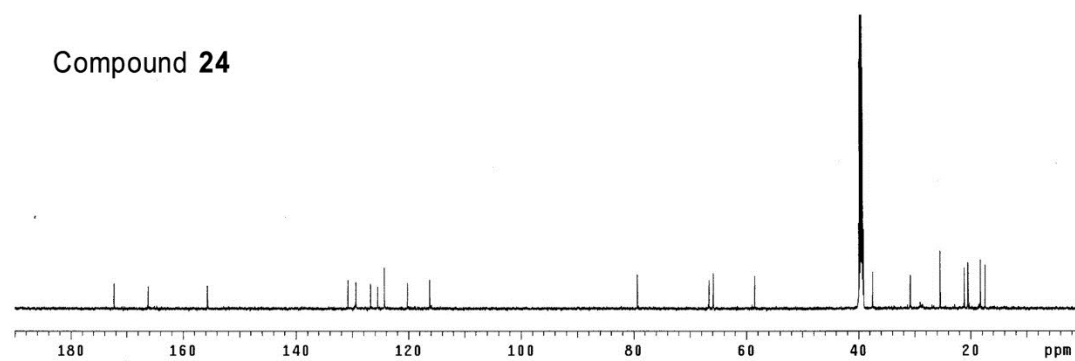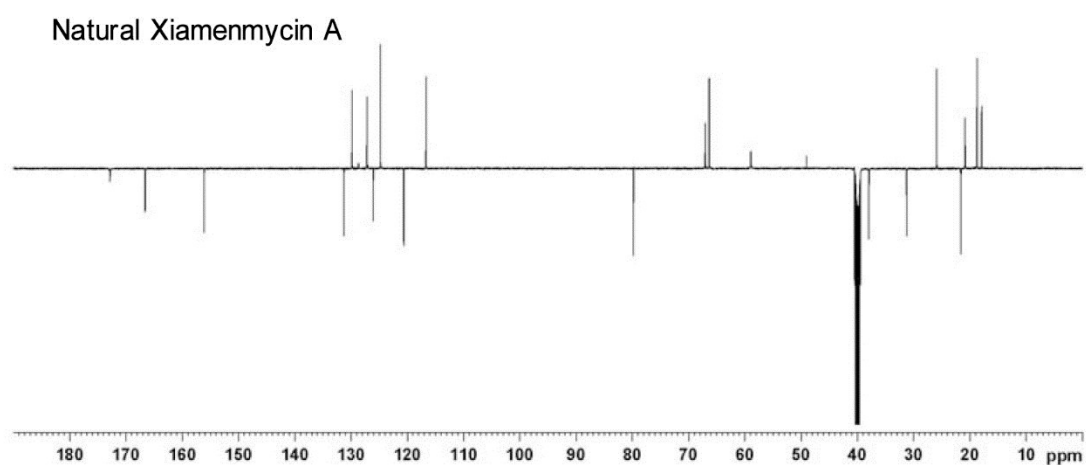

$^{13}\text{C}$  NMR comparison of **1**, **24** and natural xiamenmycin A

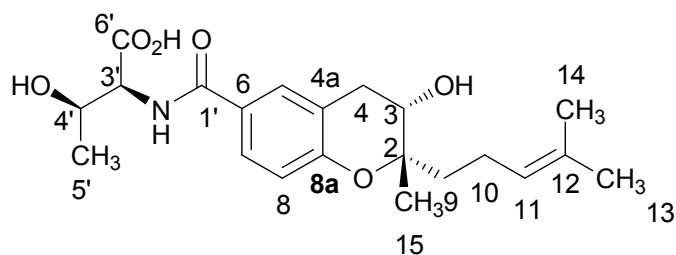

**Table the comparison of <sup>1</sup>H and <sup>13</sup>CNMR data of compound 1, 24 and reported natural xiamenmycin A**

| Position | $\delta_{\text{H}}$ (J in Hz)      |                     |                      | $\delta_{\text{C}}$                |             |            |
|----------|------------------------------------|---------------------|----------------------|------------------------------------|-------------|------------|
|          | Natural Xiamenmycin A <sup>1</sup> | Compound 24         | Compound 1           | Natural Xiamenmycin A <sup>1</sup> | Compound 24 | Compound 1 |
| 1        | --                                 | --                  | --                   | --                                 | --          | --         |
| 2        | --                                 | --                  | --                   | 79.8                               | 79.3        | 79.2       |
| 3        | 3.77, t                            | 3.74,t(5.4)         | 3.74, br.            | 66.3                               | 65.9        | 66.6       |
| 4        | 2.71,dd (17.3, 7.4)                | 2.69,dd (16.8,7.8)  | 2.69, dd (16.8, 7.2) | 31.2                               | 30.8        | 30.6       |
|          | 2.98, dd (17.3, 5.2)               | 2.96,dd (16.8, 5.4) | 2.96, dd (16.8, 5.4) |                                    |             |            |
| 4a       | --                                 | --                  | --                   | 120.6                              | 120.2       | 120.3      |
| 5        | 7.67, s                            | 7.65, s             | 7.65, s              | 129.8                              | 129.4       | 129.5      |
| 6        | --                                 | --                  | --                   | 126.0                              | 125.5       | 125.5      |
| 7        | 7.63, d (8.4)                      | 7.61,d (8.4)        | 7.61, d (8.4)        | 127.2                              | 126.8       | 126.7      |
| 8        | 6.81, d (8.4)                      | 6.79, d (8.4)       | 6.78, d (8.4)        | 116.7                              | 116.2       | 116.2      |
| 8a       | --                                 | --                  | --                   | 156.1                              | 155.7       | 155.6      |
| 9        | 1.60, m                            | 1.59, m             | 1.69-1.61            | 38.0                               | 37.5        | 33.1       |
| 10       | 2.10, m                            | 2.09, m             | 2.05, m              | 21.6                               | 21.1        | 21.3       |
| 11       | 5.12, dd(7.1,1.3)                  | 5.10, t(6.6)        | 5.08,t (7.2)         | 124.8                              | 124.3       | 124.4      |
| 12       | --                                 | --                  | --                   | 131.3                              | 130.8       | 130.7      |
| 13       | 1.57, s                            | 1.55, s             | 1.52, s              | 17.9                               | 17.4        | 17.4       |
| 14       | 1.65,s                             | 1.62, s             | 1.62, s              | 25.9                               | 25.4        | 25.4       |
| 15       | 1.18, s                            | 1.16, s             | 1.23, s              | 18.7                               | 18.3        | 22.0       |
| 1'       | --                                 | --                  | --                   | 166.6                              | 166.2       | 166.3      |
| 2'       | 7.78, d (7.8)                      | 7.77,d (8.4)        | 7.75,d (8.4)         | --                                 | --          | --         |
| 3'       | 4.38, brd                          | 4.38,dd(3.6,8.4)    | 4.38,dd(3.6,8.4)     | 58.9                               | 58.5        | 58.5       |
| 4'       | 4.18, brs                          | 4.17,m              | 4.17, m              | 67.1                               | 66.6        | 67.2       |
| 5'       | 1.12, d (6.0)                      | 1.11,d(6.6)         | 1.11, d (6.6)        | 20.9                               | 20.5        | 20.5       |
| 6'       | --                                 |                     | --                   | 172.8                              | 172.3       | 172.3      |

1. M. J. Xu, X. J. Liu, Y. L. Zhao, D. Liu, Z. H. Xu, X. M. Lang, P. Ao, W. H. Lin, S. L. Yang, Z. G. Zhang and J. Xu, *Marine drugs*, 2012, **10**, 639-654.
